# Supplementary material
Source: PubMed Central journal article supplement (PMC4971887)
Supplement: NIHMS802608-supplement-Supplemental.pdf [file NIHMS802608-supplement-Supplemental.pdf]

Supporting Information for:

# Synthesis, Radical Reactivity and Thermochemistry of Monomeric Copper(II) Alkoxide Complexes Relevant to Copper/Radical Alcohol Oxidation Catalysis

*Thomas R. Porter, Dany Capitao, Werner Kaminsky, Zhaoshen Qian and James M. Mayer\**

Department of Chemistry, University of Washington, Box 351700, Seattle, WA 98195-1700.

Current address: Department of Chemistry, Yale University, 225 Prospect St., New Haven, CT 06520.

james.mayer@yale.edu

## Contents:

|                                                                                                                                                                                               |     |
|-----------------------------------------------------------------------------------------------------------------------------------------------------------------------------------------------|-----|
| 1. Crystallographic Information .....                                                                                                                                                         | S2  |
| 2. Optical Spectra of <b>1</b> , <b>2</b> and <b>3</b> in DCM .....                                                                                                                           | S10 |
| 3. <sup>1</sup> H NMR Spectra of <b>2</b> and <b>3</b> in DCM- <i>d</i> <sub>2</sub> .....                                                                                                    | S12 |
| 4. CW X-Band EPR Spectra and Simulations of <b>1</b> , <b>2</b> and <b>3</b> .....                                                                                                            | S15 |
| 5. Cyclic Voltammetry of <b>1</b> , <b>2</b> and <b>3</b> .....                                                                                                                               | S18 |
| 6. <sup>1</sup> H NMR Spectrum of <b>1</b> with 1 equivalent of [LutH <sup>+</sup> ][ <sup>-</sup> OTf].....                                                                                  | S19 |
| 7. <sup>1</sup> H NMR Spectra of Tp <sup>t</sup> BuCu <sup>II</sup> -OTf vs [Tp <sup>t</sup> BuCu <sup>II</sup> -MeCN- <i>d</i> <sub>3</sub> <sup>+</sup> ][OTf].....                         | S21 |
| 8. <sup>1</sup> H NMR Spectra of [Tp <sup>t</sup> BuCu <sup>I</sup> ] <sub>2</sub> in toluene- <i>d</i> <sub>8</sub> vs DCM- <i>d</i> <sub>2</sub> /1% MeCN- <i>d</i> <sub>3</sub> (v/v)..... | S22 |
| 9. Attempts to Prepare Tp <sup>t</sup> BuCu <sup>II</sup> OCH <sub>2</sub> CH <sub>3</sub> .....                                                                                              | S23 |
| 10. Select Reaction and Product Characterizations involving <b>1</b> .....                                                                                                                    | S24 |
| 11. Select Reaction and Product Characterizations involving <b>2</b> .....                                                                                                                    | S38 |
| 12. Select Reaction and Product Characterizations involving <b>3</b> .....                                                                                                                    | S42 |
| 13. Thermochemical Analysis .....                                                                                                                                                             | S46 |
| 14. Computational Details .....                                                                                                                                                               | S49 |

## 1. Crystallographic Information

### 1.1 Crystallographic Information for $\text{Tp}^{\text{tBu}}\text{Cu}^{\text{II}}\text{OCH}_2\text{CF}_3$ (1)

An orange block, measuring 0.3 x 0.20 x 0.1 mm<sup>3</sup> was mounted on a glass capillary with oil. Data was collected at -163°C on a Bruker APEX II single crystal X-ray diffractometer, Mo-radiation.

Crystal-to-detector distance was 40 mm and exposure time was 10 seconds per degree for all sets. The scan width was 0.5°. Data collection was 99.6% complete to 25° in  $\vartheta$ . A total of 94153 (merged) reflections were collected covering the indices,  $h = -12$  to 12,  $k = -22$  to 22,  $l = -22$  to 22. 13369 reflections were symmetry independent and the  $R_{\text{int}} = 0.0314$  indicated that the data was good (average quality 0.07). Indexing and unit cell refinement indicated a primitive monoclinic lattice. The space group was found to be  $P 2_1/n$  (No.14).

The data was integrated and scaled using SAINT, SADABS within the APEX2 software package by Bruker.

Solution by direct methods (SHELXS, SIR97) produced a complete heavy atom phasing model consistent with the proposed structure. The structure was completed by difference Fourier synthesis with SHELXL97. Scattering factors are from Waasmair and Kirfel.<sup>1</sup> Hydrogen atoms were placed in geometrically idealised positions and constrained to ride on their parent atoms with C--H distances in the range 0.95-1.00 Angstrom. Isotropic thermal parameters  $U_{\text{eq}}$  were fixed such that they were 1.2 $U_{\text{eq}}$  of their parent atom  $U_{\text{eq}}$  for CH's and 1.5 $U_{\text{eq}}$  of their parent atom  $U_{\text{eq}}$  in case of methyl groups. All non-hydrogen atoms were refined anisotropically by full-matrix least-squares.

---

<sup>1</sup> Waasmair, D.; Kirfel, A. *Acta Cryst. A*. **1995**, 51, 416.

**Table S1:** Crystallographic data for  $\text{Tp}^{\text{tBu}}\text{Cu}^{\text{II}}\text{OCH}_2\text{CF}_3$  (**1**).

|                                   |                                                             |                             |
|-----------------------------------|-------------------------------------------------------------|-----------------------------|
| Empirical formula                 | $\text{C}_{23}\text{H}_{36}\text{BCuF}_3\text{N}_6\text{O}$ |                             |
| Formula weight                    | 543.93                                                      |                             |
| Temperature                       | 110(2) K                                                    |                             |
| Wavelength                        | 0.71073 Å                                                   |                             |
| Crystal system                    | Monoclinic                                                  |                             |
| Space group                       | P 2 <sub>1</sub> /n                                         |                             |
| Unit cell dimensions              | $a = 9.6749(12)$ Å                                          | $\alpha = 90^\circ$ .       |
|                                   | $b = 16.817(2)$ Å                                           | $\beta = 96.881(6)^\circ$ . |
|                                   | $c = 16.646(2)$ Å                                           | $\gamma = 90^\circ$ .       |
| Volume                            | 2688.9(6) Å <sup>3</sup>                                    |                             |
| Z                                 | 4                                                           |                             |
| Density (calculated)              | 1.344 Mg/m <sup>3</sup>                                     |                             |
| Absorption coefficient            | 0.860 mm <sup>-1</sup>                                      |                             |
| F(000)                            | 1140                                                        |                             |
| Crystal size                      | 0.30 x 0.30 x 0.10 mm <sup>3</sup>                          |                             |
| Theta range for data collection   | 1.73 to 28.48°.                                             |                             |
| Index ranges                      | -12 ≤ h ≤ 12, -22 ≤ k ≤ 22, -22 ≤ l ≤ 22                    |                             |
| Reflections collected             | 91453                                                       |                             |
| Independent reflections           | 6739 [R(int) = 0.0314]                                      |                             |
| Completeness to theta = 25.00°    | 99.6 %                                                      |                             |
| Max. and min. transmission        | 0.9190 and 0.7825                                           |                             |
| Refinement method                 | Full-matrix least-squares on F <sup>2</sup>                 |                             |
| Data / restraints / parameters    | 6739 / 0 / 325                                              |                             |
| Goodness-of-fit on F <sup>2</sup> | 1.036                                                       |                             |
| Final R indices [I > 2σ(I)]       | R1 = 0.0276, wR2 = 0.0701                                   |                             |
| R indices (all data)              | R1 = 0.0343, wR2 = 0.0741                                   |                             |
| Largest diff. peak and hole       | 0.661 and -0.292 e.Å <sup>-3</sup>                          |                             |

## 1.2 Crystallographic Information for $\text{Tp}^{\text{tBuMe}}\text{Cu}^{\text{II}}\text{OCH}_2\text{CF}_3$ (**2**).

An orange crystal, measuring  $0.07 \times 0.05 \times 0.03 \text{ mm}^3$  and mounted on a loop with oil. Data was collected at  $-163^\circ\text{C}$  on a Bruker APEX II single crystal X-ray diffractometer, Mo-radiation.

Crystal-to-detector distance was 40 mm and exposure time was 20 seconds per frame for all sets. The scan width was  $0.5^\circ$ . Data collection was 99.9% complete to  $25^\circ$  in  $\theta$ . A total of 68260 reflections were collected covering the indices,  $h = -11$  to 11,  $k = -41$  to 41,  $l = -11$  to 11. 5391 reflections were symmetry independent and the  $R_{\text{int}} = 0.1214$  indicated that the data was of slightly less than average quality (0.07). Indexing and unit cell refinement indicated a primitive monoclinic lattice. The space group was found to be  $P 2_1/c$  (No.14).

The data was integrated and scaled using SAINT, SADABS within the APEX2 software package by Bruker.

Solution by direct methods (SHELXS, SIR97) produced a complete heavy atom phasing model consistent with the proposed structure. The structure was completed by difference Fourier synthesis with SHELXL97. Scattering factors are from Waasmair and Kirfel.<sup>1</sup> Hydrogen atoms were placed in geometrically idealised positions and constrained to ride on their parent atoms with C---H distances in the range 0.95-1.00 Angstrom. Isotropic thermal parameters  $U_{\text{eq}}$  were fixed such that they were  $1.2U_{\text{eq}}$  of their parent atom  $U_{\text{eq}}$  for CH's and  $1.5U_{\text{eq}}$  of their parent atom  $U_{\text{eq}}$  in case of methyl groups. All non-hydrogen atoms were refined anisotropically by full-matrix least-squares.

**Table S2:** Crystallographic data for  $\text{Tp}^{\text{tBuMe}}\text{Cu}^{\text{II}}\text{OCH}_2\text{CF}_3$  (**2**).

|                                   |                                                             |                               |
|-----------------------------------|-------------------------------------------------------------|-------------------------------|
| Empirical formula                 | $\text{C}_{26}\text{H}_{42}\text{BCuF}_3\text{N}_6\text{O}$ |                               |
| Formula weight                    | 586.01                                                      |                               |
| Temperature                       | 110(2) K                                                    |                               |
| Wavelength                        | 0.71073 Å                                                   |                               |
| Crystal system                    | Monoclinic                                                  |                               |
| Space group                       | P 2 <sub>1</sub> /c                                         |                               |
| Unit cell dimensions              | $a = 9.6817(16)$ Å                                          | $\alpha = 90^\circ$ .         |
|                                   | $b = 34.735(6)$ Å                                           | $\beta = 115.495(10)^\circ$ . |
|                                   | $c = 9.6425(16)$ Å                                          | $\gamma = 90^\circ$ .         |
| Volume                            | 2926.9(8) Å <sup>3</sup>                                    |                               |
| Z                                 | 4                                                           |                               |
| Density (calculated)              | 1.330 Mg/m <sup>3</sup>                                     |                               |
| Absorption coefficient            | 0.795 mm <sup>-1</sup>                                      |                               |
| F(000)                            | 1236                                                        |                               |
| Crystal size                      | 0.07 x 0.05 x 0.03 mm <sup>3</sup>                          |                               |
| Theta range for data collection   | 2.33 to 25.45°.                                             |                               |
| Index ranges                      | -11 ≤ h ≤ 11, -41 ≤ k ≤ 41, -11 ≤ l ≤ 11                    |                               |
| Reflections collected             | 68260                                                       |                               |
| Independent reflections           | 5391 [R(int) = 0.1214]                                      |                               |
| Completeness to theta = 25.00°    | 99.9 %                                                      |                               |
| Max. and min. transmission        | 0.9765 and 0.9465                                           |                               |
| Refinement method                 | Full-matrix least-squares on F <sup>2</sup>                 |                               |
| Data / restraints / parameters    | 5391 / 0 / 355                                              |                               |
| Goodness-of-fit on F <sup>2</sup> | 1.008                                                       |                               |
| Final R indices [I > 2σ(I)]       | R1 = 0.0435, wR2 = 0.0742                                   |                               |
| R indices (all data)              | R1 = 0.0804, wR2 = 0.0855                                   |                               |
| Largest diff. peak and hole       | 0.377 and -0.403 e.Å <sup>-3</sup>                          |                               |

### 1.3.1 Crystallographic Information for $\text{Tp}^{\text{tBuMe}}\text{Cu}^{\text{II}}\text{OCH}(\text{CH}_3)\text{CF}_3$ (3)

An orange plate, measuring  $0.21 \times 0.20 \times 0.17 \text{ mm}^3$  was mounted on a loop with oil. Data was collected at  $-163^\circ\text{C}$  on a Bruker APEX II single crystal X-ray diffractometer, Mo-radiation.

Crystal-to-detector distance was 40 mm and exposure time was 10 seconds per frame for all sets. The scan width was  $0.5^\circ$ . Data collection was 99.4% complete to  $25^\circ$  in  $\theta$ . A total of 149335 reflections were collected covering the indices,  $h = -16$  to 16,  $k = -32$  to 31,  $l = -24$  to 24. 13476 reflections were symmetry independent and the  $R_{\text{int}} = 0.0447$  indicated that the data was of better than average quality (0.07). Indexing and unit cell refinement indicated a primitive monoclinic lattice. The space group was found to be  $P 2_1/n$  (No.14).

The data was integrated and scaled using SAINT, SADABS within the APEX2 software package by Bruker.

Solution by direct methods (SHELXS, SIR97) produced a complete heavy atom phasing model consistent with the proposed structure. The structure was completed by difference Fourier synthesis with SHELXL97. Scattering factors are from Waasmair and Kirfel.<sup>1</sup> Hydrogen atoms were placed in geometrically idealised positions and constrained to ride on their parent atoms with C---H distances in the range 0.95-1.00 Angstrom. Isotropic thermal parameters  $U_{\text{eq}}$  were fixed such that they were  $1.2U_{\text{eq}}$  of their parent atom  $U_{\text{eq}}$  for CH's and  $1.5U_{\text{eq}}$  of their parent atom  $U_{\text{eq}}$  in case of methyl groups. All non-hydrogen atoms were refined anisotropically by full-matrix least-squares.

Extensive disorder of the  $^-\text{OCH}(\text{CH}_3)\text{CF}_3$  ligand (over 4 different orientations) and of the pentane solvent caused the need of restraints on thermal parameters and distances of solvent and ligand to stabilize the refinement.

**Table S3:** Crystallographic data for  $\text{Tp}^{\text{tBu}}\text{Cu}^{\text{II}}\text{OCH}(\text{CH}_3)\text{CF}_3$  (**3**).

|                                   |                                                                    |                             |
|-----------------------------------|--------------------------------------------------------------------|-----------------------------|
| Empirical formula                 | $\text{C}_{29}\text{H}_{50}\text{BCuF}_3\text{N}_6\text{O}$        |                             |
| Formula weight                    | 630.10                                                             |                             |
| Temperature                       | 110(2) K                                                           |                             |
| Wavelength                        | 0.71073 Å                                                          |                             |
| Crystal system                    | Monoclinic                                                         |                             |
| Space group                       | $P 2_1/n$                                                          |                             |
| Unit cell dimensions              | $a = 10.2492(13)$ Å                                                | $\alpha = 90^\circ$ .       |
|                                   | $b = 20.261(3)$ Å                                                  | $\beta = 90.045(6)^\circ$ . |
|                                   | $c = 15.796(2)$ Å                                                  | $\gamma = 90^\circ$ .       |
| Volume                            | $3280.3(7)$ Å <sup>3</sup>                                         |                             |
| Z                                 | 4                                                                  |                             |
| Density (calculated)              | 1.276 Mg/m <sup>3</sup>                                            |                             |
| Absorption coefficient            | 0.714 mm <sup>-1</sup>                                             |                             |
| F(000)                            | 1340                                                               |                             |
| Crystal size                      | 0.21 x 0.20 x 0.17 mm <sup>3</sup>                                 |                             |
| Theta range for data collection   | 1.63 to 34.22°.                                                    |                             |
| Index ranges                      | $-16 \leq h \leq 16$ , $-32 \leq k \leq 31$ , $-24 \leq l \leq 24$ |                             |
| Reflections collected             | 149335                                                             |                             |
| Independent reflections           | 13476 [R(int) = 0.0447]                                            |                             |
| Completeness to theta = 25.00°    | 99.4 %                                                             |                             |
| Max. and min. transmission        | 0.8882 and 0.8645                                                  |                             |
| Refinement method                 | Full-matrix least-squares on F <sup>2</sup>                        |                             |
| Data / restraints / parameters    | 13476 / 322 / 530                                                  |                             |
| Goodness-of-fit on F <sup>2</sup> | 1.033                                                              |                             |
| Final R indices [I > 2sigma(I)]   | R1 = 0.0639, wR2 = 0.1514                                          |                             |
| R indices (all data)              | R1 = 0.0904, wR2 = 0.1725                                          |                             |
| Largest diff. peak and hole       | 1.752 and -3.380 e.Å <sup>-3</sup>                                 |                             |

### 1.3.2 X-Ray Crystal Structure of $\text{Tp}^{\text{Bu}}\text{Cu}^{\text{II}}\text{OCH}(\text{CH}_3)\text{CF}_3$ and Select Geometric Parameters.

The X-Ray Crystal Structure of  $\text{Tp}^{\text{Bu}}\text{Cu}^{\text{II}}\text{OCH}(\text{CH}_3)\text{CF}_3$  has a solid state structure that is more tetrahedral than either (1) or (2) with a  $\tau$  value of 0.63 (vs. 0.76 for both (1) and (2)).

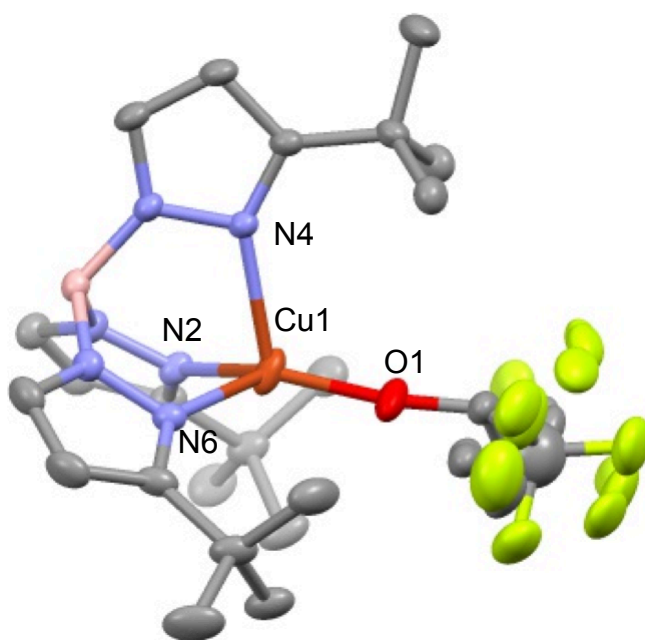

**Figure S1.** ORTEP drawing of  $\text{Tp}^{\text{Bu}}\text{Cu}^{\text{II}}\text{-OCH}(\text{CH}_3)\text{CF}_3$ . Hydrogen atoms are omitted for clarity. One pentane molecule co-crystallizes with  $\text{Tp}^{\text{Bu}}\text{Cu}^{\text{II}}\text{-OCH}(\text{CH}_3)\text{CF}_3$  but is not shown here. The racemic  $\text{OC}^*\text{H}(\text{CH}_3)\text{CF}_3$  ligand is disordered over 4 positions. Selected interatomic distances ( $\text{\AA}$ ) and angles (deg): N2-Cu1, 1.9733(16); N4-Cu1, 2.1740(15); N6-Cu1, 2.0640(16); Cu1-O1, 1.7923(17); O1-Cu1-N2, 137.53(8); O1-Cu1-N6, 121.47(9); N2-Cu1-N6, 91.68(7); O1-Cu1-N4, 110.91(7); N2-Cu1-N4, 91.64(6); N6-Cu1-N4, 92.24(6).  $\tau = 0.63$ .



### 1.4 $\tau$ Value analysis of the X-ray structures of **1**, **2**, **3** and related structures.

The degree of geometric distortion from tetrahedral can be described quantitatively with the pyramidalization normalization parameter,  $\tau$ , defined as:

$$\tau = [\Sigma (L_{\text{basal}}-M-L_{\text{basal}}) - \Sigma(L_{\text{basal}}-M-L_{\text{axial}})]/90$$

$\tau$  varies from 0 for a perfect tetrahedral to 1 for perfect trigonal monopyramidal.

**Table S4.**  $\tau$  and EPR parameters for various TpCu<sup>II</sup>-X complexes

| Complex                                                                                     | $\tau$ value | EPR Signal      | Ref. <sup>a</sup> |
|---------------------------------------------------------------------------------------------|--------------|-----------------|-------------------|
| Tp <sup><i>t</i>Bu</sup> Cu <sup>II</sup> OTf                                               | 0.39         | Rhombic         | 8a                |
| Tp <sup><i>t</i>BuMe</sup> Cu <sup>II</sup> Cl                                              | 0.44         | NR <sup>b</sup> | 9b                |
| Tp <sup><i>t</i>Bu</sup> Cu <sup>II</sup> Cl                                                | 0.47         | Rhombic         | 9a, 8d            |
| Tp <sup><i>t</i>Bu</sup> Cu <sup>II</sup> OCH(CH <sub>3</sub> )CF <sub>3</sub> ( <b>3</b> ) | 0.63         | Rhombic         | This work         |
| Tp <sup><i>i</i>Pr<i>i</i>Pr</sup> Cu <sup>II</sup> SArF <sub>5</sub> <sup>a</sup>          | 0.64         | Axial           | 10a               |
| Tp <sup><i>i</i>Pr<i>i</i>Pr</sup> Cu <sup>II</sup> OOCm <sup>a,b</sup>                     | 0.75         | Axial           | 10b, 10f          |
| Tp <sup><i>t</i>Bu</sup> Cu <sup>II</sup> OCH <sub>2</sub> CF <sub>3</sub> ( <b>1</b> )     | 0.76         | Axial           | This work         |
| Tp <sup><i>t</i>BuMe</sup> Cu <sup>II</sup> OCH <sub>2</sub> CF <sub>3</sub> ( <b>2</b> )   | 0.76         | Axial           | This work         |
| Tp <sup><i>i</i>Pr<i>i</i>Pr</sup> Cu <sup>II</sup> S <i>t</i> Bu <sup>a</sup>              | 0.82         | Axial           | 10c               |

<sup>a</sup> References refer to citations in the main text. <sup>b</sup> NR = not reported.

<sup>c</sup> Tp<sup>*i*Pr*i*Pr</sup> = hydro-*tris*(3,5-di-*iso*-propyl-pyrazolyl)borate. <sup>d</sup> OOCm = cumyl peroxide.

**2. Optical Spectra of 1, 2 and 3 in DCM.**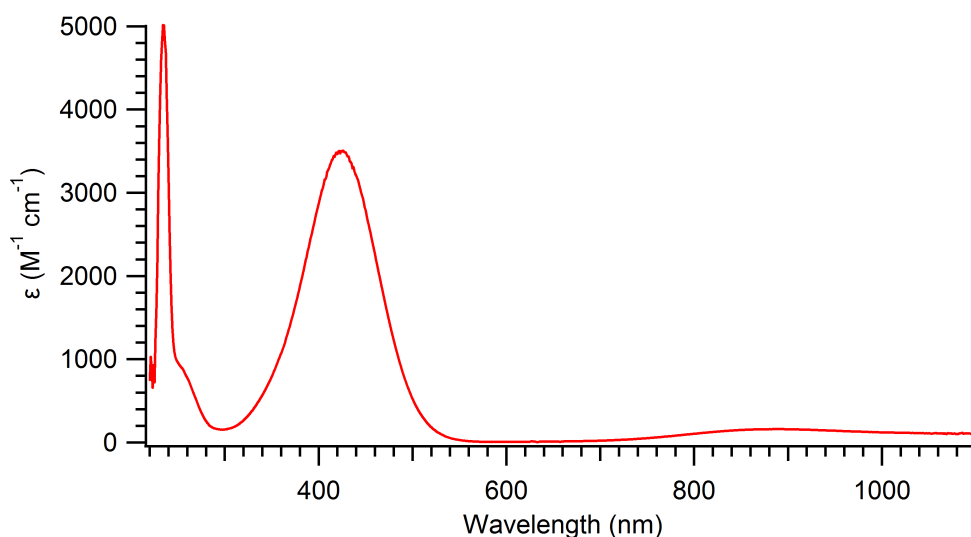

**Figure S2.** The Optical Spectrum of  $\text{Tp}^{t\text{Bu}}\text{Cu}^{\text{II}}\text{OCH}_2\text{CF}_3$  (**1**) in dichloromethane.  $\lambda_{\text{max}} = 424$  nm ( $3500 \pm 350 \text{ M}^{-1} \text{ cm}^{-1}$ ),  $\lambda_{\text{max}} = 886$  ( $160 \pm 20 \text{ M}^{-1} \text{ cm}^{-1}$ ).

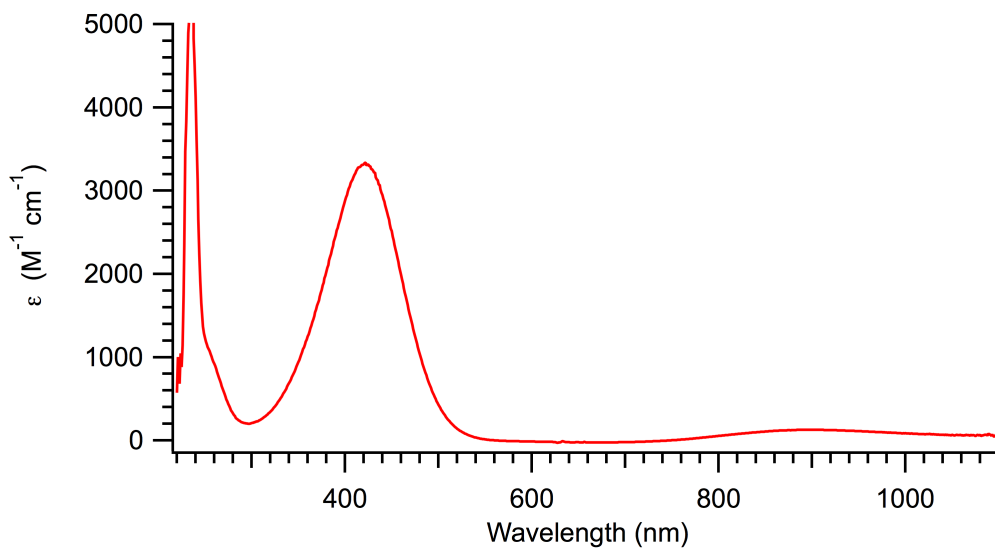

**Figure S3.** The Optical Spectrum of  $\text{Tp}^{t\text{BuMe}}\text{Cu}^{\text{II}}\text{OCH}_2\text{CF}_3$  (**2**) in dichloromethane.  $\lambda_{\text{max}} = 423$  nm ( $3300 \pm 330 \text{ M}^{-1} \text{ cm}^{-1}$ ),  $\lambda_{\text{max}} = 902$  ( $130 \pm 20 \text{ M}^{-1} \text{ cm}^{-1}$ ).

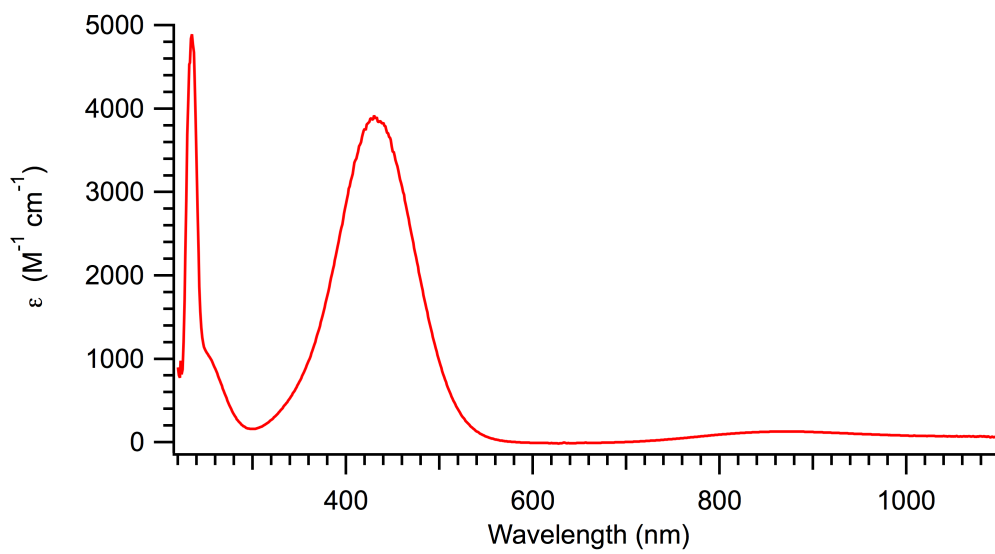

**Figure S4.** The Optical Spectrum of  $\text{Tp}^{t\text{Bu}}\text{Cu}^{\text{II}}\text{-OCH}(\text{CH}_3)\text{CF}_3$  (**3**) in dichloromethane.  $\lambda_{\text{max}} = 432$  nm ( $3900 \pm 390 \text{ M}^{-1} \text{ cm}^{-1}$ ),  $\lambda_{\text{max}} = 869$  ( $130 \pm 20 \text{ M}^{-1} \text{ cm}^{-1}$ ).

3.  $^1\text{H}$  NMR Spectra of **2** and **3** in  $\text{DCM-}d_2$ .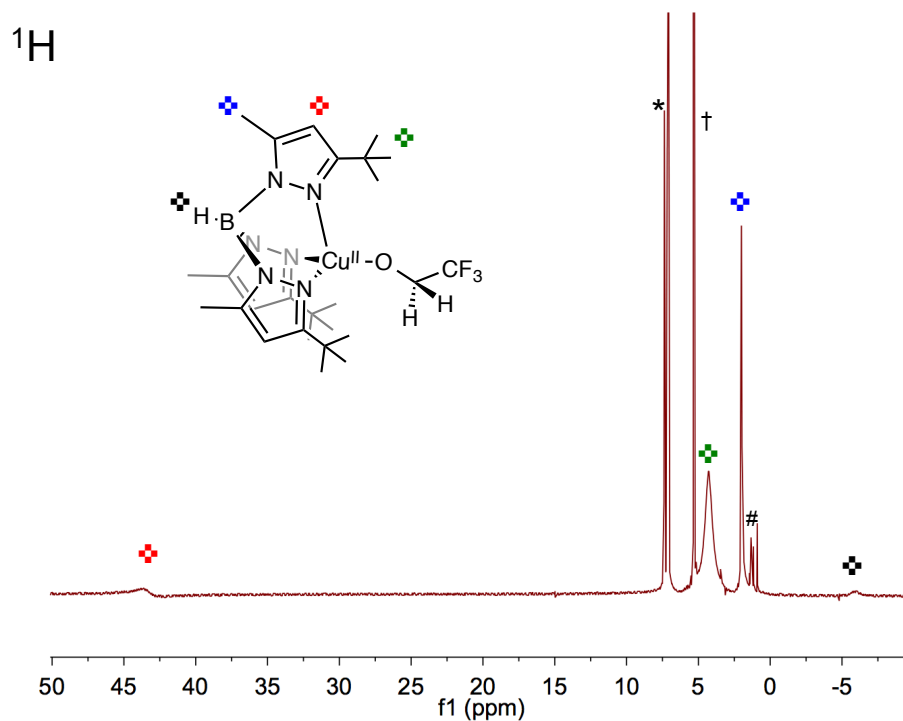

**Figure S5.**  $^1\text{H}$  NMR spectrum of  $\text{Tp}^{t\text{BuMe}}\text{Cu}^{\text{II}}\text{OCH}_2\text{CF}_3$  (**2**) in  $\text{DCM-}d_2$ . Peak assignments for **2** are shown by ⊠. Residual solvent signal is annotated with † while a fluorobenzene internal standard is shown with \*. The # symbol corresponds to trace diamagnetic impurities present.

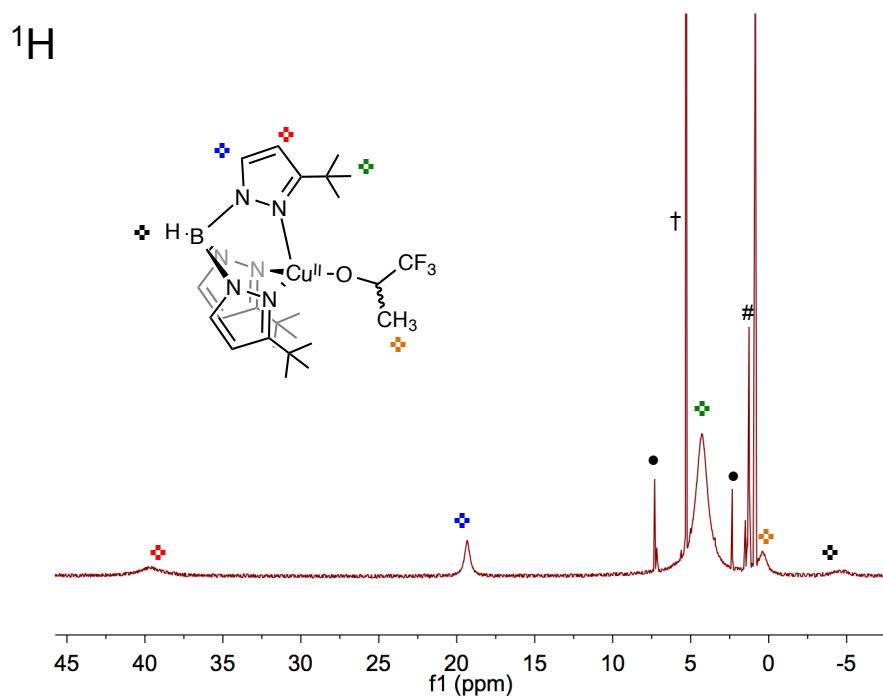

**Figure S6.**  $^1\text{H}$  NMR spectrum of  $\text{Tp}^{\text{tBu}}\text{Cu}^{\text{II}}\text{OCH}(\text{CH}_3)\text{CF}_3$  (**3**) in  $\text{DCM-d}_2$ . Peak assignments for **3** are shown by ✚. Residual solvent signal is annotated with †, residual toluene and ether from synthesis are shown with • and #, respectively.

**Table S5.  $^1\text{H}$  NMR Resonances of related  $\text{Tp}^{t\text{Bu}}\text{Cu}^{\text{II}}\text{-X}$  and  $\text{Tp}^{t\text{BuMe}}\text{Cu}^{\text{II}}\text{-X}$ .<sup>a,b</sup>**

| Complex                                                                  | <i>Pz-4-H</i> | <i>Pz-5-H</i>              | <i>Pz-3-<sup>t</sup>Bu</i> | B-H  |
|--------------------------------------------------------------------------|---------------|----------------------------|----------------------------|------|
| $\text{Tp}^{t\text{Bu}}\text{Cu}^{\text{II}}\text{Cl}$ <sup>§c,8a</sup>  | 49.3          | 24.1                       | 4.8                        | -4.4 |
| $\text{Tp}^{t\text{Bu}}\text{Cu}^{\text{II}}\text{OTf}$ <sup>§c,8a</sup> | 56.5          | 21.0                       | 5.5                        | -5.4 |
| <b>1</b>                                                                 | 40.5          | 18.4                       | 4.4                        | -5.4 |
| <b>3</b>                                                                 | 39.6          | 19.3                       | 4.0                        | -4.6 |
|                                                                          | <i>Pz-4-H</i> | <i>Pz-5-CH<sub>3</sub></i> | <i>Pz-3-<sup>t</sup>Bu</i> | B-H  |
| $\text{Tp}^{t\text{BuMe}}\text{Cu}^{\text{II}}\text{Cl}$ <sup>§9b</sup>  | 53.0          | 4.1                        | 4.6                        | -5.1 |
| $\text{Tp}^{t\text{BuMe}}\text{Cu}^{\text{II}}\text{OTf}$                | 59.0          | 10.4                       | 4.5                        | -6.0 |
| <b>2</b>                                                                 | 43.3          | 2.0                        | 4.3                        | -5.9 |

<sup>§</sup>References refer to citations in the main text. <sup>a</sup> Values at 25° C. NMR spectra in dichloromethane-*d*<sub>2</sub>, with chemical shifts in ppm; <sup>b</sup> NMR assignments for *pz-4-H* and *pz-5-H* were made by comparison to  $\text{Tp}^{t\text{BuMe}}\text{Cu}^{\text{II}}$  analogues. N.R. = not reported. <sup>c</sup> Complexes previously reported but without NMR characterization.

#### 4. CW X-band EPR spectra and simulations of 1, 2 and 3.

Samples were prepared at concentrations of  $\sim 1.5$  mM in toluene glasses. EPR spectra were collected on a Bruker EMX CW X-band spectrometer at 120 K. Data were simulated using the MATLAB 7.5 toolbox, EasySpin 4.5.5.<sup>2</sup> More complete analysis of the EPR spectra of **1** can be found in reference <sup>3</sup>.

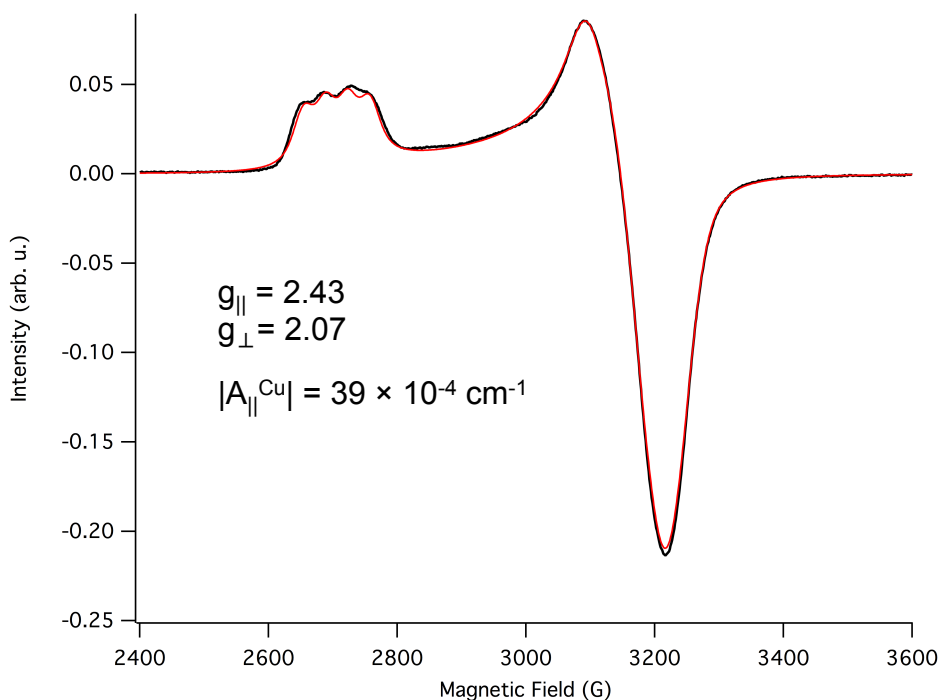

**Figure S7.** X-Band CW EPR Spectrum of 2.5 mM  $\text{Tp}^{t\text{Bu}}\text{Cu}^{\text{II}}\text{OCH}_2\text{CF}_3$  in a toluene glass at 120 K. Data is shown in black and simulation is shown in red.

<sup>2</sup> Stoll, S.; Schweiger, A. *J. Magn. Reson.* **2006**, 174, 42.

<sup>3</sup> Hayes, E. C.; Porter, T. R.; Barrows, C. J.; Kaminsky, W.; Mayer, J. M.; Stoll, S. *Submitted* Dec. 2015.

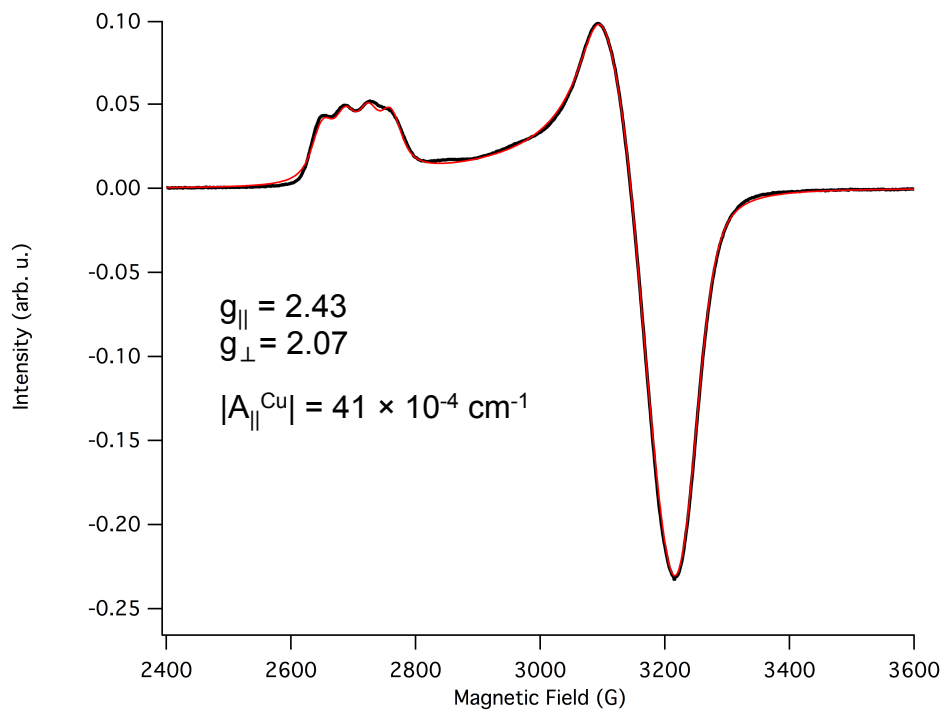

**Figure S8.** X-Band CW EPR Spectrum of 2.5 mM  $\text{Tp}^{\text{tBuMe}}\text{Cu}^{\text{II}}\text{OCH}_2\text{CF}_3$  (**2**) in a toluene glass at 120 K. Data is shown in black and simulation is shown in red.



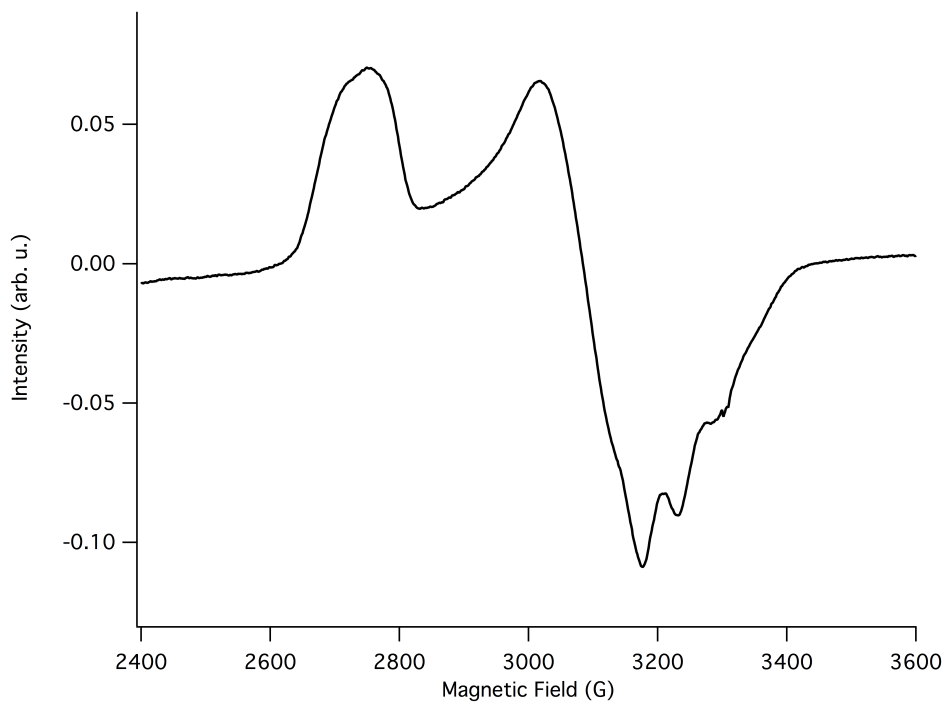

**Figure S9.** X-Band CW EPR Spectrum of 2.5 mM  $\text{Tp}^{\text{tBu}}\text{Cu}^{\text{II}}\text{OCH}(\text{CH}_3)\text{CF}_3$  (**3**) in a toluene glass at 120 K (not simulated). The spectrum displays a rhombic signal unlike the axial signal observed for **1** or **2**.

### 5. Cyclic Voltammetry of **1**, **2** and **3**.

Cyclic voltammetry of **1**, **2** and **3** (~2.5 mM) was performed in dichloromethane with 0.1 M [<sup>n</sup>Bu<sub>4</sub>N][PF<sub>6</sub>] supporting electrolyte and a ferrocene internal standard. Scan rates used were 100 mV/s. Data was collected in a N<sub>2</sub> filled glovebox. The electrochemical setup consisted of a glassy carbon working electrode, silver *pseudo*-reference electrode and a platinum auxiliary electrode. Values reported are referenced to the ferrocene/ferrocenium couple.

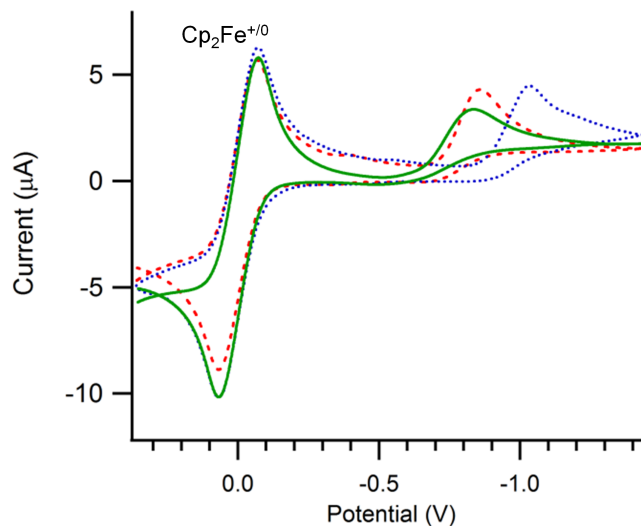

**Figure S10.** Cyclic voltammograms of 2.5 mM **1** (dashed red), **2** (dotted blue) and **3** (solid green) in dichloromethane at 100 mV s<sup>-1</sup> under N<sub>2</sub> with 0.1 M [<sup>n</sup>Bu<sub>4</sub>N][PF<sub>6</sub>] and a glassy carbon working electrode. The potential is referenced to the Fc<sup>+0</sup> couple.

### 6. $^1\text{H}$ NMR spectra of **1** with one equivalent of $[\text{LutH}^+][\text{OTf}]^-$ .

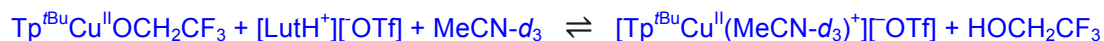

In a J. Young NMR tube, 15.3 mM  $\text{Tp}^{\text{tBu}}\text{Cu}^{\text{II}}\text{OCH}_2\text{CF}_3$  in  $\text{DCM-}d_2/1\%$   $\text{MeCN-}d_3$  (v/v) was combined with one equivalent of 2,6-lutidinium triflate. After  $\sim 20$  minutes the  $^1\text{H}$  NMR spectrum of the reaction solution was collected. Peak assignments for  $[\text{Tp}^{\text{tBu}}\text{Cu}^{\text{II}}(\text{MeCN-}d_3)^+][\text{OTf}]^-$  were confirmed by spiking a known sample of  $\text{Tp}^{\text{tBu}}\text{Cu}^{\text{II}}\text{OTf}$  with  $\text{MeCN-}d_3$ . In a separate control experiment, 2,6-lutidine was found to not displace  $\text{MeCN-}d_3$  from  $[\text{Tp}^{\text{tBu}}\text{Cu}^{\text{II}}(\text{MeCN-}d_3)^+][\text{OTf}]^-$  under these conditions.

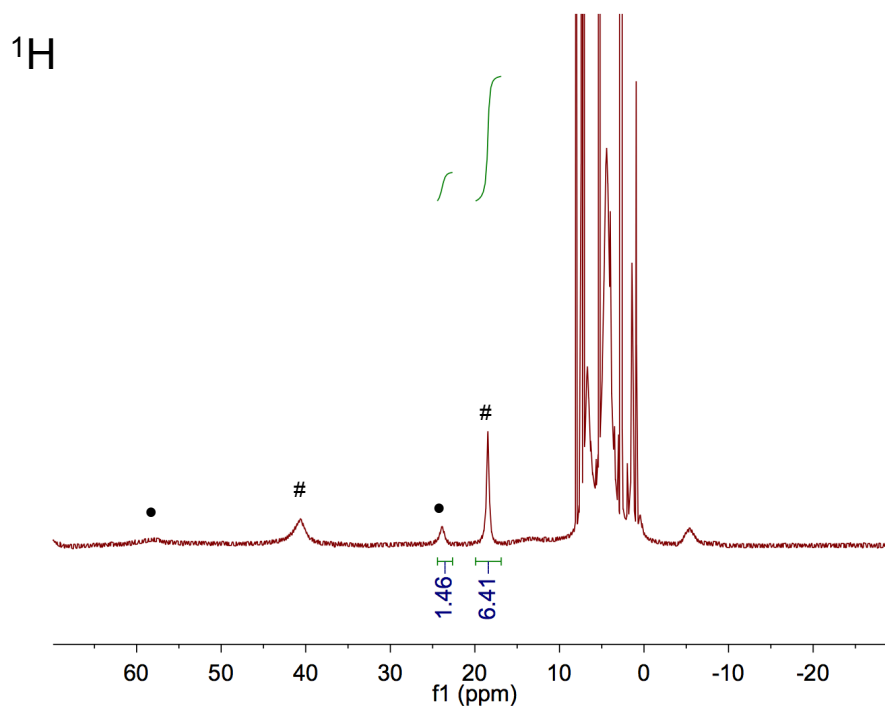

**Figure S10.** The  $^1\text{H}$  NMR spectrum of the reaction between **2** and 2,6-lutidinium triflate in  $\text{DCM-}d_2/1\%$   $\text{MeCN-}d_3$  (v/v). Complex **2** is shown with # and  $[\text{Tp}^{\text{tBu}}\text{Cu}^{\text{II}}(\text{MeCN-}d_3)^+]$  is shown with •. Relative integrations show a  $\sim 4:1$  ratio of  $\text{Tp}^{\text{tBu}}\text{Cu}^{\text{II}}\text{OCH}_2\text{CF}_3/[\text{Tp}^{\text{tBu}}\text{Cu}^{\text{II}}(\text{MeCN-}d_3)^+]$ .

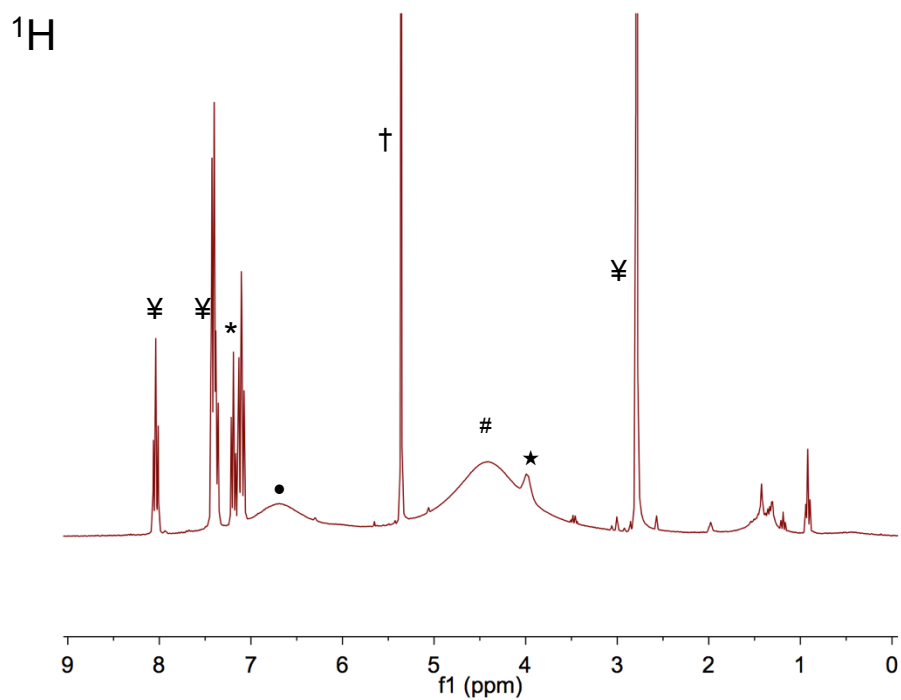

**Figure S11.** The expanded view of the  $^1\text{H}$  NMR spectrum of the *pseudo*-equilibrium reaction between **2** and 2,6-lutidinium triflate in  $\text{DCM-}d_2/1\%$   $\text{MeCN-}d_3$  (v/v). Complex **2** is shown with # and  $[\text{Tp}^{t\text{Bu}}\text{Cu}^{\text{II}}(\text{MeCN-}d_3)]^+$  is shown with •. 2,6-lutidine/lutidinium triflate is shown with ‡, TFE with ★ and the residual solvent signal with †.

**7.  $^1\text{H}$  NMR Spectra of  $\text{Tp}^{\text{tBu}}\text{Cu}^{\text{II}}\text{-OTf}$  vs  $[\text{Tp}^{\text{tBu}}\text{Cu}^{\text{II}}\text{-MeCN-}d_3^+][\text{OTf}]$ .**

The  $^1\text{H}$  NMR spectra of  $\text{Tp}^{\text{tBu}}\text{Cu}^{\text{II}}\text{-OTf}$  in  $\text{DCM-}d_2$  or  $\text{DCM-}d_2$  with 1%  $\text{MeCN-}d_3$  (v/v) are dramatically different. We attribute this to the formation of  $[\text{Tp}^{\text{tBu}}\text{Cu}^{\text{II}}\text{-MeCN}^+][\text{OTf}]$  upon exposure of  $\text{Tp}^{\text{tBu}}\text{Cu}^{\text{II}}\text{-OTf}$  to  $\text{MeCN-}d_3$ .

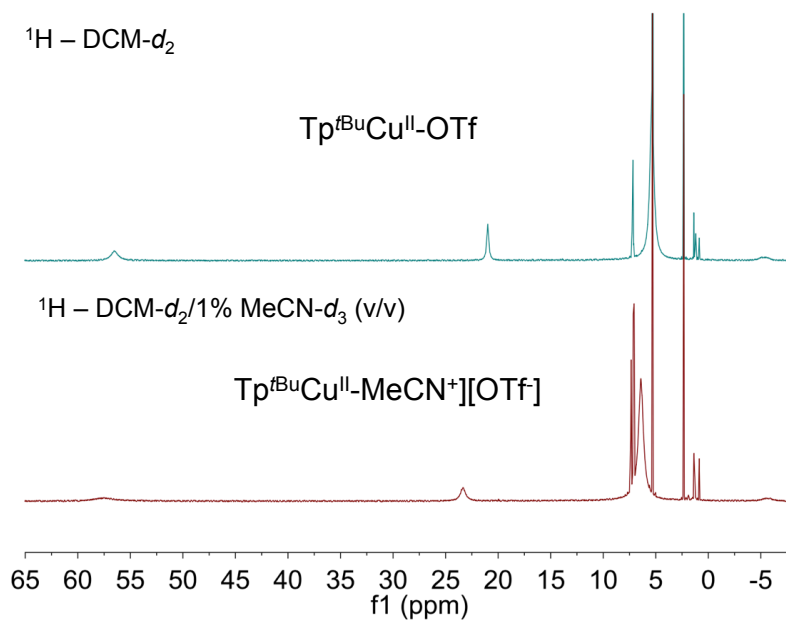

**Figure S12.** The  $^1\text{H}$  NMR spectrum of  $\text{Tp}^{\text{tBu}}\text{Cu}^{\text{II}}\text{-OTf}$  in  $\text{DCM-}d_2$  (top) and  $[\text{Tp}^{\text{tBu}}\text{Cu}^{\text{II}}\text{-MeCN}^+][\text{OTf}]$  in  $\text{DCM-}d_2/1\% \text{MeCN-}d_3$  (v/v).

**8. [Tp<sup>t</sup>BuCu<sup>I</sup>]<sub>2</sub> in toluene-*d*<sub>8</sub> vs DCM-*d*<sub>2</sub>/1% MeCN-*d*<sub>3</sub> (v/v).**

In the absence of a Lewis base to occupy the vacant coordination site of copper in “Tp<sup>t</sup>BuCu<sup>I</sup>”, rapid formation and dissociation of [Tp<sup>t</sup>BuCu]<sub>2</sub> dimers<sup>4</sup> and adduct formation with trace solvent impurities complicate the <sup>1</sup>H NMR spectrum. This can be seen in the <sup>1</sup>H NMR spectrum of [Tp<sup>t</sup>BuCu<sup>I</sup>]<sub>2</sub> in toluene. In DCM-*d*<sub>2</sub> with 1% MeCN-*d*<sub>3</sub> (v/v), MeCN-*d*<sub>3</sub> binds to the open coordination site forming 2 Tp<sup>t</sup>BuCu<sup>I</sup>(MeCN-*d*<sub>3</sub>) and the <sup>1</sup>H NMR is dramatically simplified.

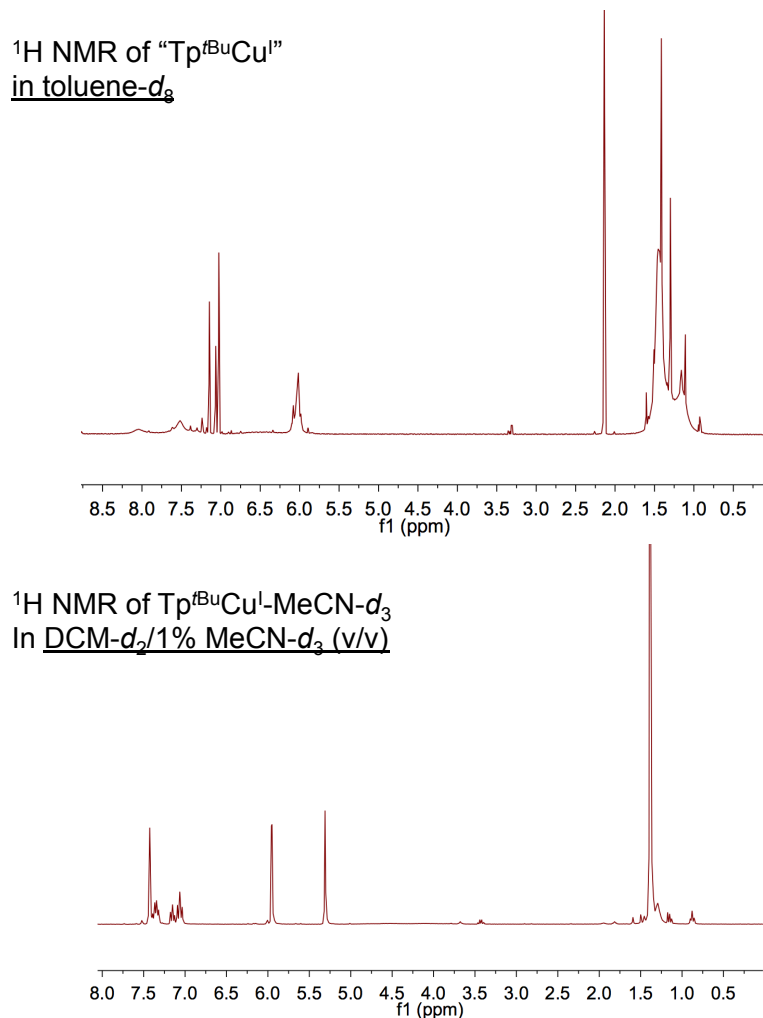

**Figure S13.** The <sup>1</sup>H NMR spectrum of “Tp<sup>t</sup>BuCu<sup>I</sup>” in toluene-*d*<sub>8</sub> (top) and Tp<sup>t</sup>BuCu<sup>I</sup>(MeCN-*d*<sub>3</sub>) in DCM-*d*<sub>2</sub>/1% MeCN-*d*<sub>3</sub> (v/v) with C<sub>6</sub>H<sub>5</sub>F internal standard (bottom).

(4) Carrier, S. M.; Ruggiero, C. E.; Houser, R. P.; Tolman, W. B. *Inorg. Chem.* **1993**, 32, 4889.

### 9. Attempts to prepare $\text{Tp}^{\text{tBu}}\text{Cu}^{\text{II}}\text{-OCH}_2\text{CH}_3$

In attempts to prepare a copper alkoxide with a non-fluorinated alkoxide ligand, a toluene- $d_8$  solution containing 15.3 mM  $\text{Tp}^{\text{tBu}}\text{Cu}^{\text{II}}\text{OTf}$  was treated with 1.2 equivalents of ethanol and 1 equivalent of DBU. The  $^1\text{H}$  NMR spectrum was collected within 10 minutes of mixing and displayed new paramagnetically shifted peaks we have tentatively assigned to ' $\text{Tp}^{\text{tBu}}\text{Cu}^{\text{II}}\text{OCH}_2\text{CH}_3$ ' as well as many unidentifiable diamagnetic side products. Attempts to isolate ' $\text{Tp}^{\text{tBu}}\text{Cu}^{\text{II}}\text{OCH}_2\text{CH}_3$ ' were unsuccessful and led to further decomposition.

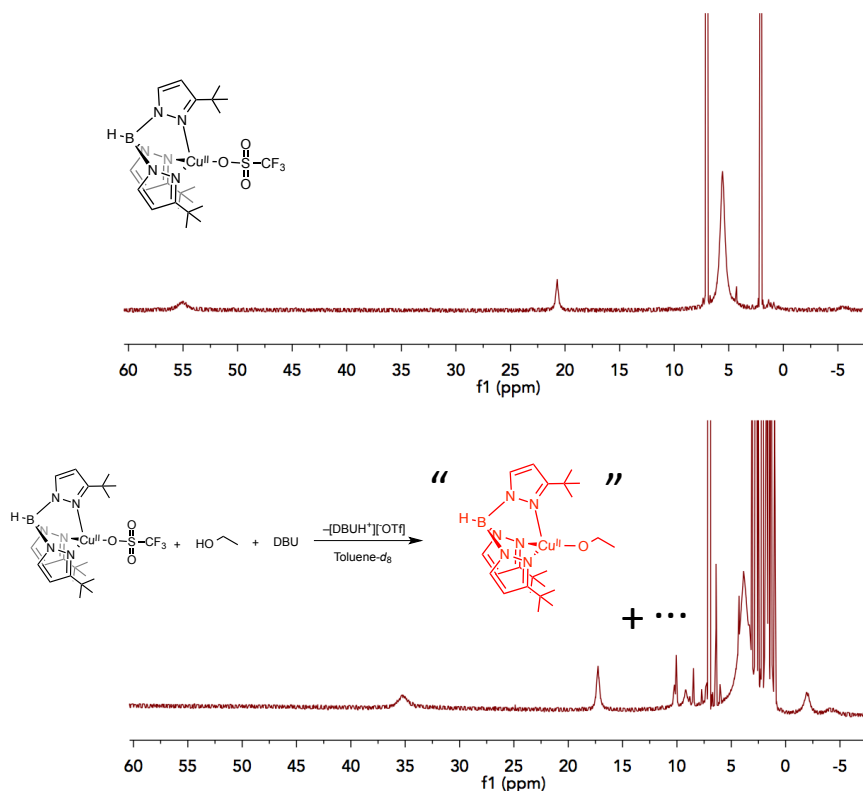

**Figure S14.** Stack of the  $^1\text{H}$  NMR spectrum of  $\text{Tp}^{\text{tBu}}\text{Cu}^{\text{II}}\text{OTf}$  (top) and the reaction between  $\text{Tp}^{\text{tBu}}\text{Cu}^{\text{II}}\text{-OTf} + 1.2 \text{ EtOH} + \text{DBU}$  to generate ' $\text{Tp}^{\text{tBu}}\text{Cu}^{\text{II}}\text{OCH}_2\text{CH}_3$ ' and various diamagnetic products (bottom); Both in toluene- $d_8$ .

## 10. Select Reaction and Product Characterizations involving (1).

**10.1.**  $^1\text{H}$  and  $^{19}\text{F}$  NMR spectra of the completed reaction between 15.3 mM  $\text{Tp}^{\text{tBu}}\text{Cu}^{\text{II}}\text{OCH}_2\text{CF}_3$  (1) and 1 eq TEMPO-H in  $\text{DCM-}d_2/1\%$   $\text{MeCN-}d_3$  (v/v).

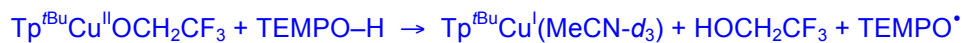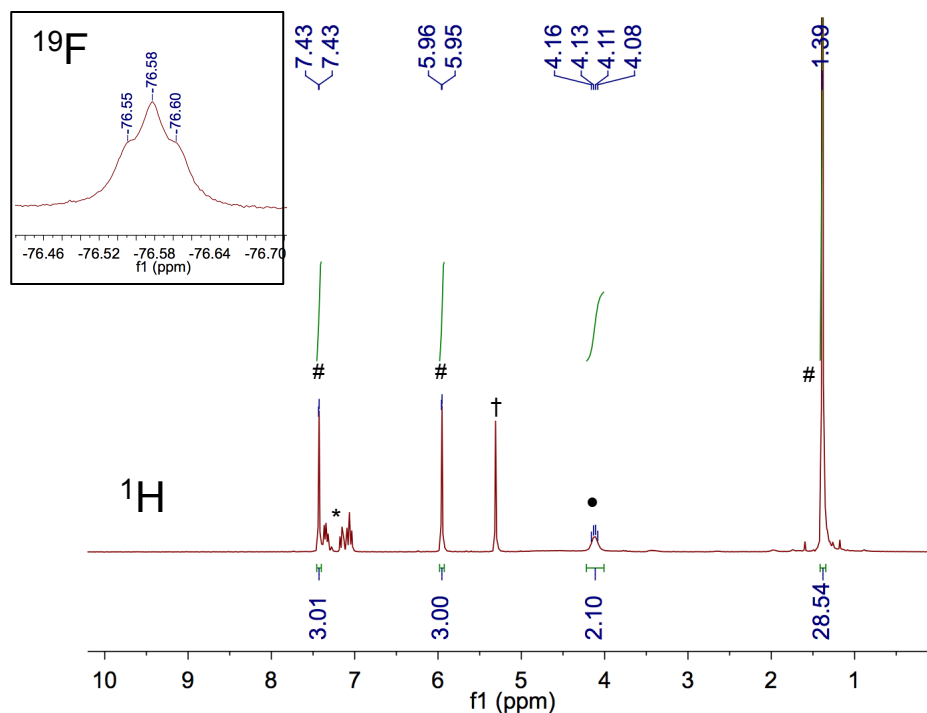

**Figure S15.**  $^1\text{H}$  NMR spectrum of the completed reaction between 15.3 mM  $\text{Tp}^{\text{tBu}}\text{Cu}^{\text{II}}\text{OCH}_2\text{CF}_3$  and 1 eq TEMPO-H in  $\text{DCM-}d_2/1\%$   $\text{MeCN-}d_3$ . Signals for  $\text{Tp}^{\text{tBu}}\text{Cu}^{\text{I}}\text{-MeCN-}d_3$  are shown by # and 2,2,2-trifluoroethanol is shown by •. The fluorobenzene internal standard and residual solvent signals are labeled \* and †, respectively. The  $^{19}\text{F}$  NMR signal for 2,2,2-trifluoroethanol is shown in the inset.



**10.2. Optical Spectrum of the completed reaction between 15.3 mM  $\text{Tp}^{\text{tBu}}\text{Cu}^{\text{II}}\text{OCH}_2\text{CF}_3$  and  ${}^{\text{tBu}}\text{Bu}_3\text{ArO-H}$  in  $\text{DCM-}d_2/1\% \text{MeCN-}d_3$  (v/v).**

The reaction between  $\text{Tp}^{\text{tBu}}\text{Cu}^{\text{II}}\text{-OCH}_2\text{CF}_3$  and  ${}^{\text{tBu}}\text{Bu}_3\text{ArO-H}$  was carried out in an NMR tube with 15.3 mM  $\text{Tp}^{\text{tBu}}\text{Cu}^{\text{II}}\text{-OCH}_2\text{CF}_3$  and one equivalent of  ${}^{\text{tBu}}\text{Bu}_3\text{ArO-H}$ . After the reaction was complete (as determined by  ${}^1\text{H}$  NMR) the solution was diluted with a stock solution of  $\text{DCM}/1\%\text{MeCN}$  (v/v) to give an expected final concentration of products of 0.25 mM. The optical spectrum was collected and the absorption at 626 nm was found to be 0.102 absorbance units. This is consistent with the predicted final  ${}^{\text{tBu}}\text{Bu}_3\text{ArO}^\bullet$  concentration of  $0.255 \pm 0.020$  as calculated from the reported extinction coefficient ( $\epsilon_{626 \text{ nm}} = 400 \pm 20 \text{ M}^{-1} \text{ cm}^{-1}$ ).<sup>5</sup>

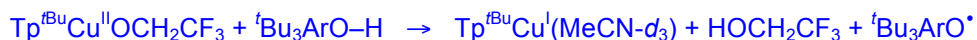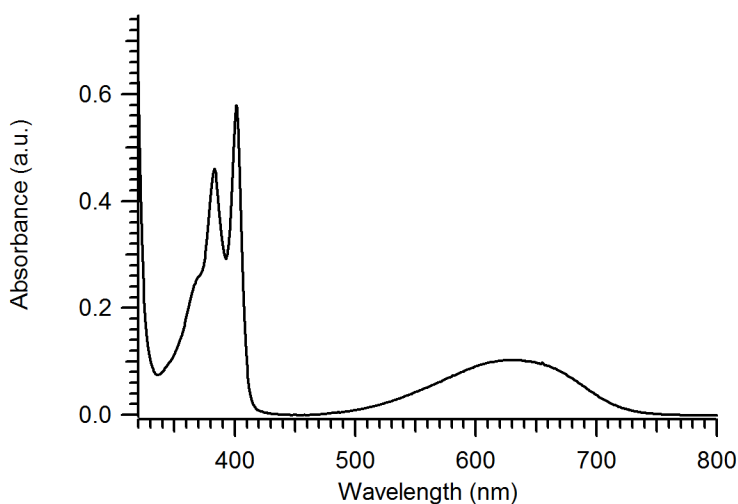

**Figure S16.** The UV/Vis spectrum of the completed reaction between  $\text{Tp}^{\text{tBu}}\text{Cu}^{\text{II}}\text{OCH}_2\text{CF}_3$  and  ${}^{\text{tBu}}\text{Bu}_3\text{ArO-H}$  diluted for optical measurements.

(5) Manner, V. W.; Markle, T. F.; Freudenthal, J. H.; Roth, J. P.; Mayer, J. M. *Chem. Commun.* **2008**, 256.

**10.3.** The  $^1\text{H}$  NMR spectrum of the completed reaction between 15.3 mM  $\text{Tp}^{\text{tBu}}\text{Cu}^{\text{II}}\text{OCH}_2\text{CF}_3$  and 50 equivalents 1,4-cyclohexadiene in  $\text{DCM-}d_2/1\%$   $\text{MeCN-}d_3$  (v/v).

The reaction between  $\text{Tp}^{\text{tBu}}\text{Cu}^{\text{II}}\text{OCH}_2\text{CF}_3$  and 1,4-cyclohexadiene (1,4-CHD) requires 2 weeks to reach completion. The reaction was carried out in a J. Young NMR tube covered with aluminum foil and stored in a nitrogen filled glovebox. The benzene generated roughly equated to 0.5 equivalents with respect to initial  $\text{Tp}^{\text{tBu}}\text{Cu}^{\text{II}}\text{OCH}_2\text{CF}_3$  after correcting for the benzene impurity previously present in 1,4-cyclohexadiene and the overlapping reference peaks (fluorobenzene).

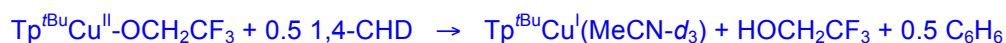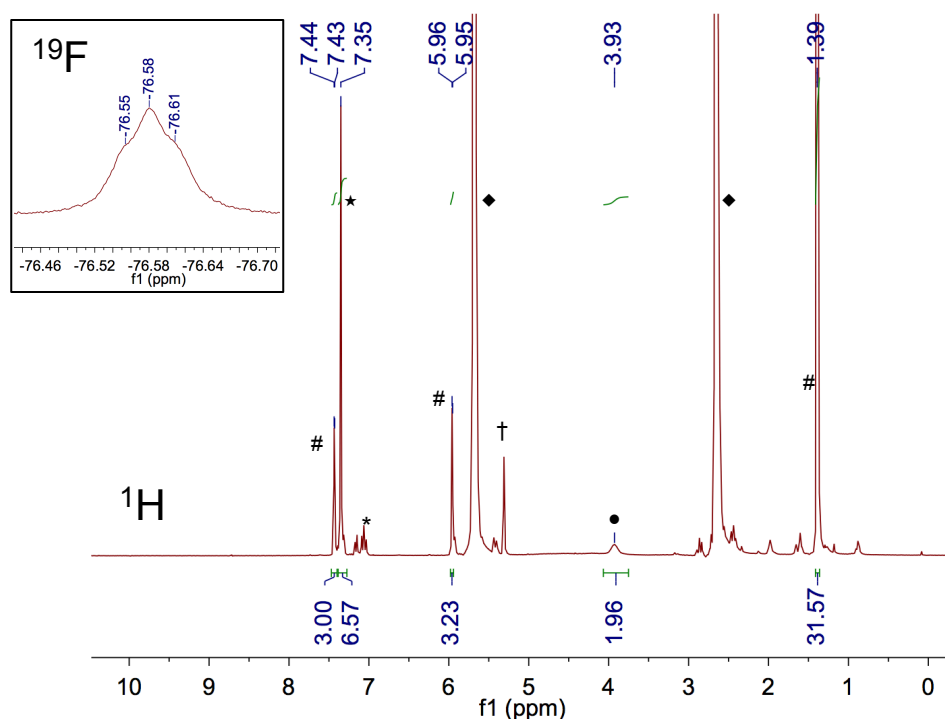

**Figure S17.**  $^1\text{H}$  NMR spectrum of the completed reaction between 15.3 mM  $\text{Tp}^{\text{tBu}}\text{Cu}^{\text{II}}\text{OCH}_2\text{CF}_3$  and 50 eq 1,4-cyclohexadiene in  $\text{DCM-}d_2/1\%$   $\text{MeCN-}d_3$ . Signals for  $\text{Tp}^{\text{tBu}}\text{Cu}^{\text{I}}(\text{MeCN-}d_3)$  are shown with #, 2,2,2-trifluoroethanol is shown with • and benzene is shown with ★. The fluorobenzene internal standard and residual solvent signals are labeled \* and †, respectively. The remaining 1,4-cyclohexadiene is shown with ♦. The  $^{19}\text{F}$  NMR signal for 2,2,2-trifluoroethanol is shown in the inset.

**10.4.**  $^1\text{H}$  NMR and Optical Spectrum for the Completed Reaction Between 15.3 mM  $\text{Tp}^{\text{tBu}}\text{Cu}^{\text{II}}\text{OCH}_2\text{CF}_3$  and one equivalent of 2,6- $^t\text{Bu}_2$ -4-(4-nitrophenyl)phenol [ $^t\text{Bu}_2(\text{O}_2\text{NC}_6\text{H}_4)\text{C}_6\text{H}_2\text{O-H}$ ].

An NMR tube was charged with 15.3 mM  $\text{Tp}^{\text{tBu}}\text{Cu}^{\text{II}}\text{OCH}_2\text{CF}_3$  and one equivalent of 2,6- $^t\text{Bu}_2$ -4-(4-nitrophenyl)phenol in  $\text{DCM-}d_2/1\%$   $\text{MeCN-}d_3$  (v/v). After the reaction was complete (as determined by  $^1\text{H}$  NMR) the solution was diluted with a stock solution of  $\text{DCM}/1\%$   $\text{MeCN}$  (v/v) to give an expected final concentration of products of 2.0 mM. The optical spectrum was collected and the absorption at 625 nm was found to be 1.02 absorbance units, corresponding to a final 2,6- $^t\text{Bu}_2$ -4-(4-nitrophenyl)phenoxy concentration of  $1.96 \pm 0.20$  mM as calculated from the reported extinction coefficient ( $\epsilon_{625\text{ nm}} = 520 \pm 25 \text{ M}^{-1} \text{ cm}^{-1}$ ).<sup>6</sup> This is consistent with the predicted concentration of 2.0 mM.

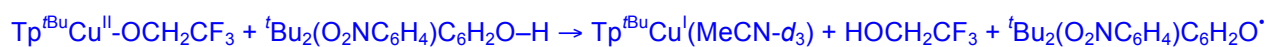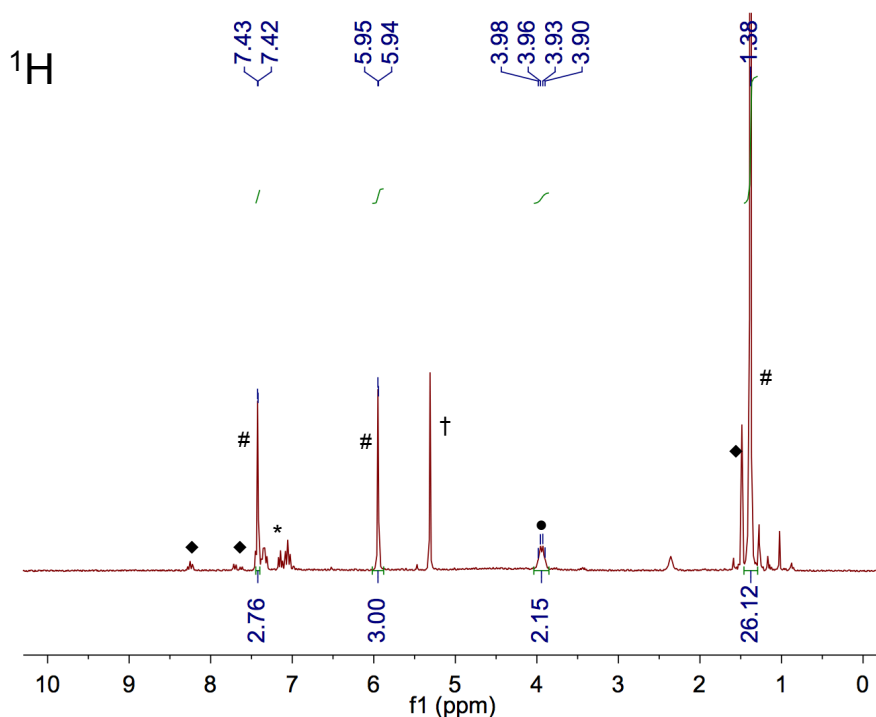

**Figure S18.**  $^1\text{H}$  NMR spectrum of the completed reaction between 15.3 mM  $\text{Tp}^{\text{tBu}}\text{Cu}^{\text{II}}\text{OCH}_2\text{CF}_3$  and 1 equivalent 2,6- $^t\text{Bu}_2$ -4-(4-nitrophenyl)phenol in  $\text{DCM-}d_2/1\%$   $\text{MeCN-}d_3$ . Signals for  $\text{Tp}^{\text{tBu}}\text{Cu}^{\text{I}}\text{-MeCN-}d_3$  are shown with #, 2,2,2-trifluoroethanol is shown with •. Trace excess  $^t\text{Bu}_2\text{NPArO-H}$  is shown with ♦, residual solvent signal with † and the fluorobenzene internal standard with \*.

(6) Porter, T. R.; Kaminsky, W.; Mayer, J. M. *J. Org. Chem.* **2014**, 79, 9451.

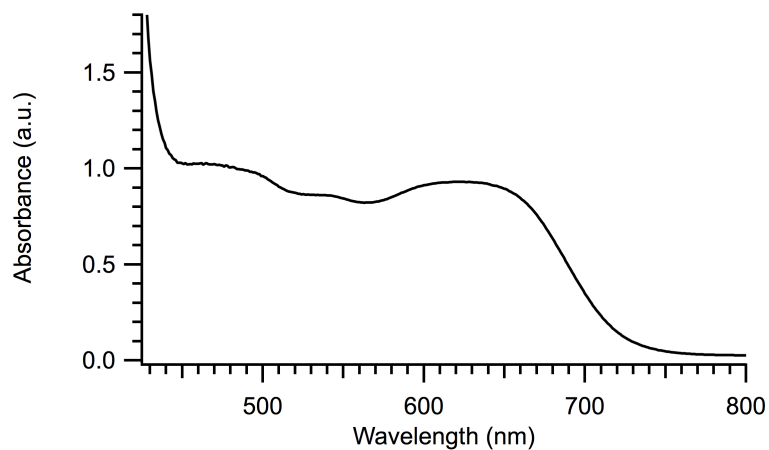

**Figure S19.** The UV/Vis spectrum of the completed reaction between  $\text{Tp}^{t\text{Bu}}\text{Cu}^{\text{II}}\text{OCH}_2\text{CF}_3$  and 1 equivalent 2,6- $t\text{Bu}_2$ -4-(4-nitrophenyl)phenol in  $\text{DCM-}d_2/1\%$   $\text{MeCN-}d_3$ , diluted to 2 mM for optical measurements.

**10.5.** NMR Spectra of the Completed Disproportionation Reaction of 15.3 mM  $\text{Tp}^{\text{tBu}}\text{Cu}^{\text{II}}\text{OCH}_2\text{CF}_3$  catalyzed with 1 eq TEMPO in  $\text{DCM-}d_2/1\%$   $\text{MeCN-}d_3$  (v/v).

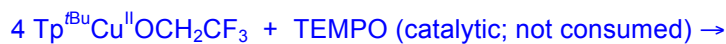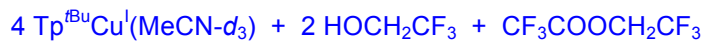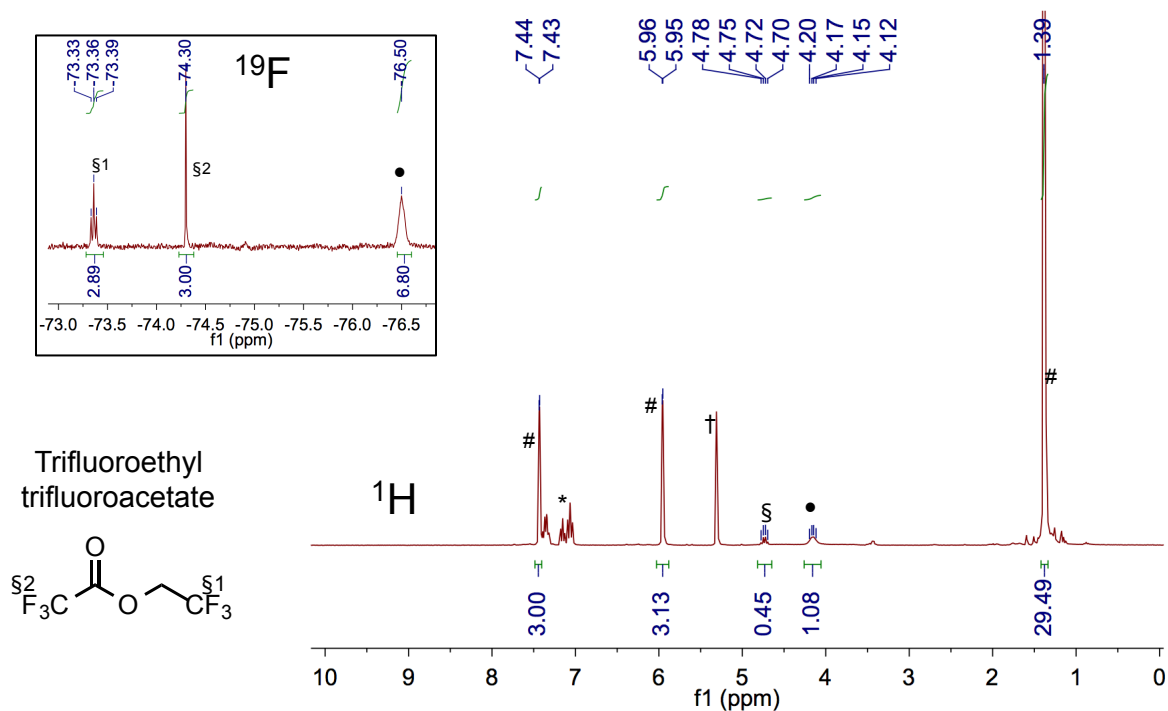

**Figure S20.** The  $^1\text{H}$  NMR spectrum of the completed reaction between  $\text{Tp}^{\text{tBu}}\text{Cu}^{\text{II}}\text{OCH}_2\text{CF}_3$  and catalytic TEMPO showing the production of  $\text{Tp}^{\text{tBu}}\text{Cu}^{\text{I}}(\text{MeCN-}d_3)$  (#), 0.5 eq 2,2,2-trifluoroethanol (•) and 0.25 eq trifluoroethyl trifluoroacetate (§). The residual solvent signals is shown with † and the fluorobenzene internal standard is shown with \*. Inset displays the  $^{19}\text{F}$  NMR spectrum of the same reaction mixture.

**10.6. Kinetic Trace for the Disproportionation Reaction of 15.3 mM  $\text{Tp}^{\text{tBu}}\text{Cu}^{\text{II}}\text{OCH}_2\text{CF}_3$  catalyzed with 1 eq TEMPO in  $\text{DCM-}d_2/1\% \text{MeCN-}d_3$  (v/v)**

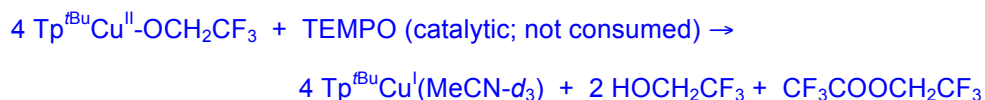

The kinetic trace for this reaction was obtained by preparing a 15.3 mM  $\text{DCM-}d_2/1\%\text{MeCN-}d_3$  (v/v) solution of  $\text{Tp}^{\text{tBu}}\text{Cu}^{\text{II}}\text{OCH}_2\text{CF}_3$  and one eq TEMPO in a J. Young NMR tube in a nitrogen filled glovebox. Shortly after mixing (*ca.* 5 minutes),  $^1\text{H}$  NMR spectra were collected at 5 minute intervals until the reaction had reached completion. Only 1 scan per spectrum was collected in order to ensure complete T1 relaxation was reached between scans. Reaction progress was monitored by integration of the  $\text{Tp}^{\text{tBu}}\text{Cu}^{\text{I}}(\text{MeCN-}d_3)$  pyrazole peak at  $\delta$  5.95 ppm vs. a fluorobenzene internal standard (shown below with  $\circ$ ). The same experiment was performed with the  $\text{Tp}^{\text{tBu}}\text{Cu}^{\text{II}}\text{OCD}_2\text{CF}_3$  isotopologue (shown below with  $\times$ ).

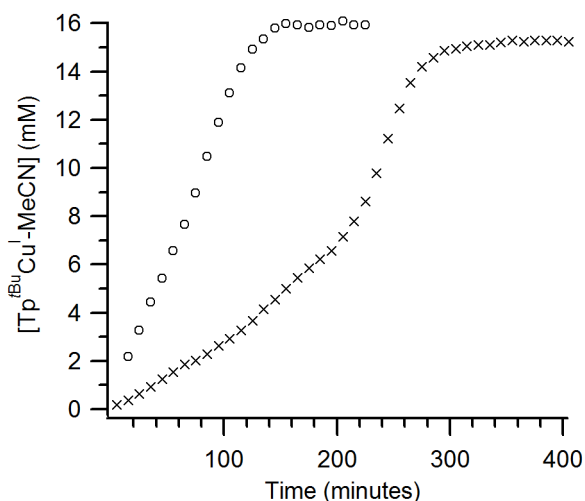

**Figure S21.** Kinetic traces for the disproportionation reaction of  $\text{Tp}^{\text{tBu}}\text{Cu}^{\text{II}}\text{OC(H/D)}_2\text{CF}_3$  catalyzed by 1 eq TEMPO. The trace for  $\text{Tp}^{\text{tBu}}\text{Cu}^{\text{II}}\text{OCH}_2\text{CF}_3$  is shown with  $\circ$  while the trace for  $\text{Tp}^{\text{tBu}}\text{Cu}^{\text{II}}\text{OCD}_2\text{CF}_3$  is shown with  $\times$ .

**10.7.** NMR spectra of the completed reaction between 15.3 mM  $\text{Tp}^{\text{tBu}}\text{Cu}^{\text{II}}\text{OCH}_2\text{CF}_3$  and  ${}^t\text{Bu}_3\text{ArO}^\bullet$  in  $\text{DCM-}d_2/1\%$   $\text{MeCN-}d_3$  (v/v) and characterization of  ${}^t\text{Bu}_3\text{CHDO-TFE}$ .

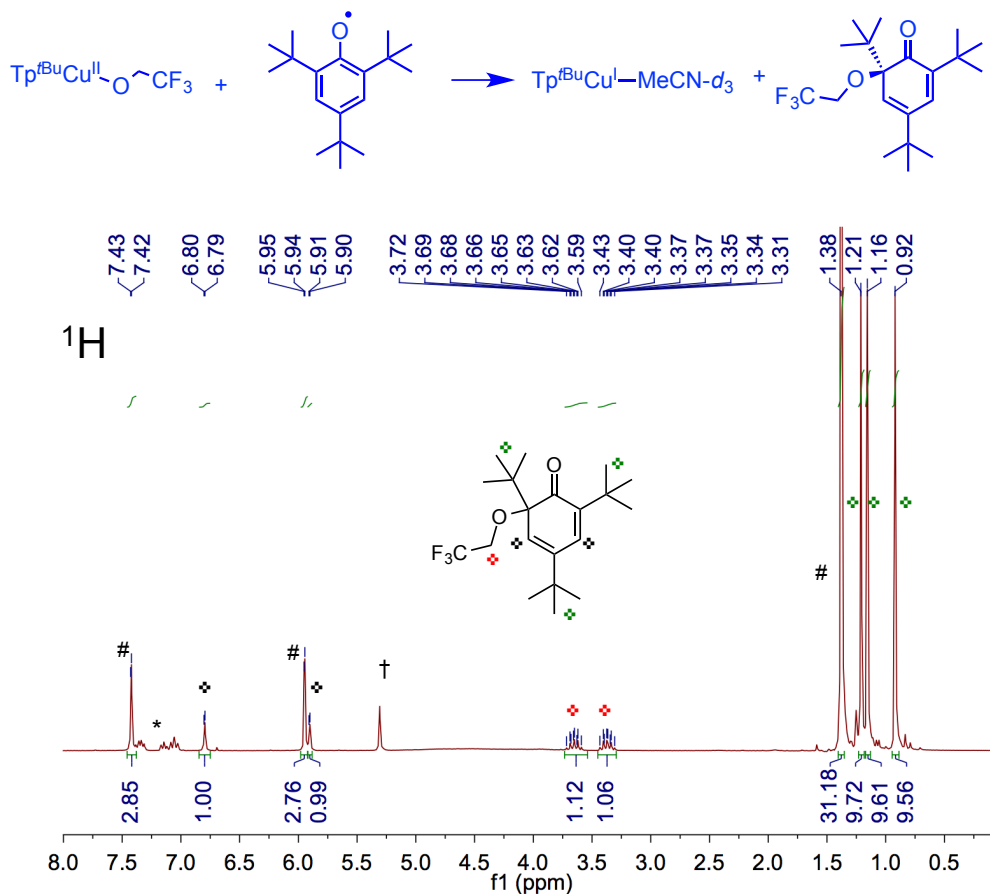

**Figure S22.**  ${}^1\text{H}$  NMR spectrum of the completed reaction between 15.3 mM  $\text{Tp}^{\text{tBu}}\text{Cu}^{\text{II}}\text{-OCH}_2\text{CF}_3$  and 1 eq  ${}^t\text{Bu}_3\text{ArO}^\bullet$  in  $\text{DCM-}d_2/1\%$   $\text{MeCN-}d_3$  (v/v). Signals for  $\text{Tp}^{\text{tBu}}\text{Cu}^{\text{I}}\text{-MeCN-}d_3$  are shown with # and signals for  ${}^t\text{Bu}_3\text{CHDO-TFE}$  are shown with +. The fluorobenzene internal standard is shown with \*.

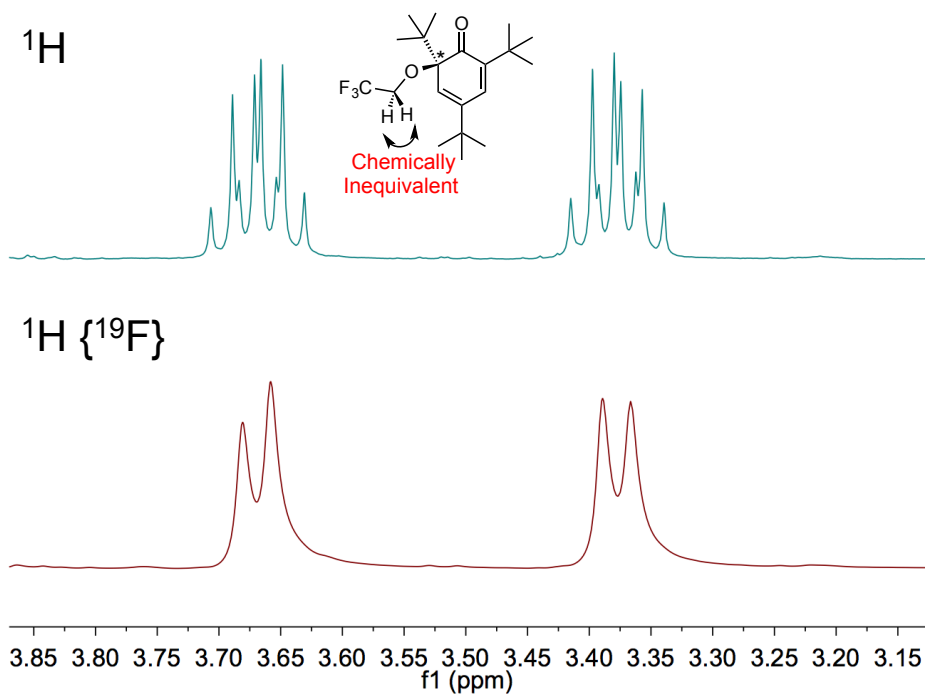

**Figure S23.** Expanded view of the  $^1\text{H}$  (top) and  $^1\text{H}\{^{19}\text{F}\}$  (bottom) NMR spectra (500 MHz, in  $\text{DCM}-d_2/1\%$   $\text{MeCN}-d_3$  (v/v)) of  $^t\text{Bu}_3\text{CHDO-TFE}$ , **4**, displaying the signals for the trifluoroethyl ether methylene  $-\text{CH}_2$  unit.



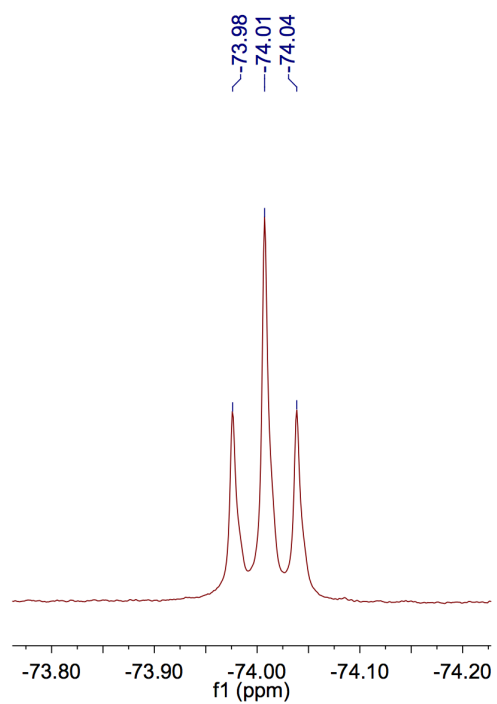

**Figure S24.**  $^{19}\text{F}$  NMR spectrum of  $t\text{Bu}_3\text{CHDO-TFE}$  (282 MHz, in  $\text{DCM-}d_2/1\%$   $\text{MeCN-}d_3$  (v/v)).

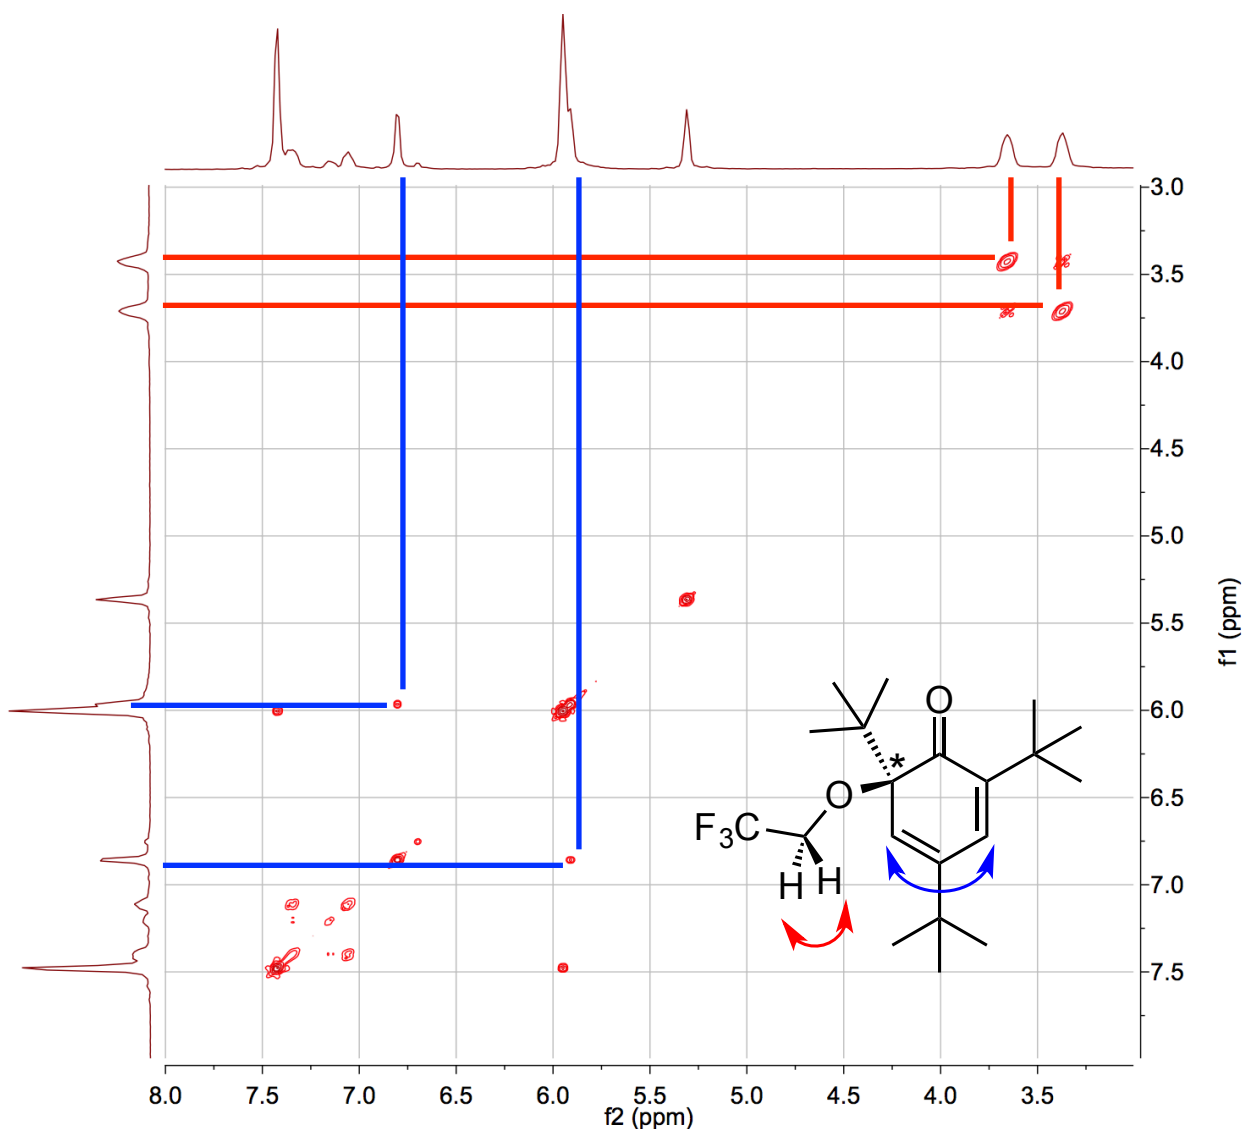

**Figure S25.** COSY spectrum of the completed reaction between 15.3 mM  $\text{Tp}^{\text{tBu}}\text{Cu}^{\text{II}}\text{OCH}_2\text{CF}_3$  and 1 equivalent of  ${}^t\text{Bu}_3\text{ArO}^\bullet$  in  $\text{DCM-}d_2/1\%$   $\text{MeCN-}d_3$ .

From these NMR experiments, the following assignments were made:  ${}^1\text{H}$  NMR of  ${}^t\text{Bu}_3\text{CHDO-TFE}$  (300 MHz,  $\text{DCM-}d_2$ , 1%  $\text{MeCN-}d_3$  (v/v), fluorobenzene int. std.):  $\delta$  6.80 (d,  ${}^4J_{\text{HH}} = 2.4$  Hz, 1H), 5.91 (d,  ${}^4J_{\text{HH}} = 2.4$  Hz, 1H), 3.66 (dq,  ${}^2J_{\text{HH}} = 11.4$  Hz,  ${}^3J_{\text{HF}} = 9.0$  Hz, 1H), 3.37 (dq,  ${}^2J_{\text{HH}} = 11.4$  Hz,  ${}^3J_{\text{HF}} = 9.0$  Hz), 1.22 (s, 9H), 1.16 (s, 9H), 0.93 (s, 9H).  ${}^{19}\text{F}$  NMR (282 MHz,  $\text{DCM-}d_2$ , 1%  $\text{MeCN-}d_3$  (v/v), fluorobenzene int. std.):  $\delta$  -73.95 (t,  ${}^3J_{\text{HF}} = 9.0$  Hz, 3F).

### 10.8. GC/MS of $^t\text{Bu}_3\text{CHDO-TFE}$

We found isolation of  $^t\text{Bu}_3\text{CHDO-TFE}$  difficult because of the small scales in which it was produced. However, GC/MS (electron impact ionization) of the crude reaction material displays a chromatogram with a large peak displaying an  $M^+$  signal at 304 m/z that we have assigned to  $^t\text{Bu}_3\text{CHDO-TFE}$  minus isobutylene. This seems like a reasonable assignment considering hard ionization source used.

### 10.9. IR Spectroscopy of the completed reaction mixture containing $\text{Tp}^{t\text{Bu}}\text{Cu}^{\text{I}}\text{-MeCN-}d_3$ and $^t\text{Bu}_3\text{CHDO-TFE}$ .

Similarly, because isolation of  $^t\text{Bu}_3\text{CHDO-TFE}$  was problematic, the IR spectrum of the entire reaction mixture was collected (NaCl plate). The peak observed at  $1670\text{ cm}^{-1}$  was assigned to the C=O stretch of  $^t\text{Bu}_3\text{CHDO-TFE}$ . This stretch is in good agreement with related quinoidal species which have values in the same range ( $1670 - 1700\text{ cm}^{-1}$ ).<sup>7</sup>

(7) Pelter, A.; Elgendy, S. M. A. *J. Chem. Soc. Perkin Trans. 1* **1993**, 1891.

**10.10.** Pseudo-First Order Kinetic Measurements for  $\text{Tp}^{\text{tBu}}\text{Cu}^{\text{II}}\text{OCH}_2\text{CF}_3$  plus  ${}^t\text{Bu}_3\text{ArO}^\bullet$  in DCM/1% MeCN (v/v).

In each measurement, a cuvette equipped with a gas tight septum was filled with a known concentration of  ${}^t\text{Bu}_3\text{ArO}^\bullet$  (8.9 – 88.6 mM) in DCM/MeCN 1% (v/v).  $\text{Tp}^{\text{tBu}}\text{Cu}^{\text{II}}\text{OCH}_2\text{CF}_3$  was injected into the cuvette from a gastight syringe (to give a final concentration of 0.5 mM) immediately prior to starting kinetic measurements. The kinetics were monitored by UV/Vis spectroscopy. The large excess of  ${}^t\text{Bu}_3\text{ArO}^\bullet$  saturated most of the signal from  $\text{Tp}^{\text{tBu}}\text{Cu}^{\text{II}}\text{OCH}_2\text{CF}_3$  but monitoring the optical change between 400 and 500 nm proved sufficient for tracking reaction progress. Data were fit by SPECFIT/32™ global analysis program to a simple first order model. The second order rates calculated were generally reproducible when the same solvent batch was used for measurements but were irreproducible between stock solvents or even when the same stock solvent was used on different days.

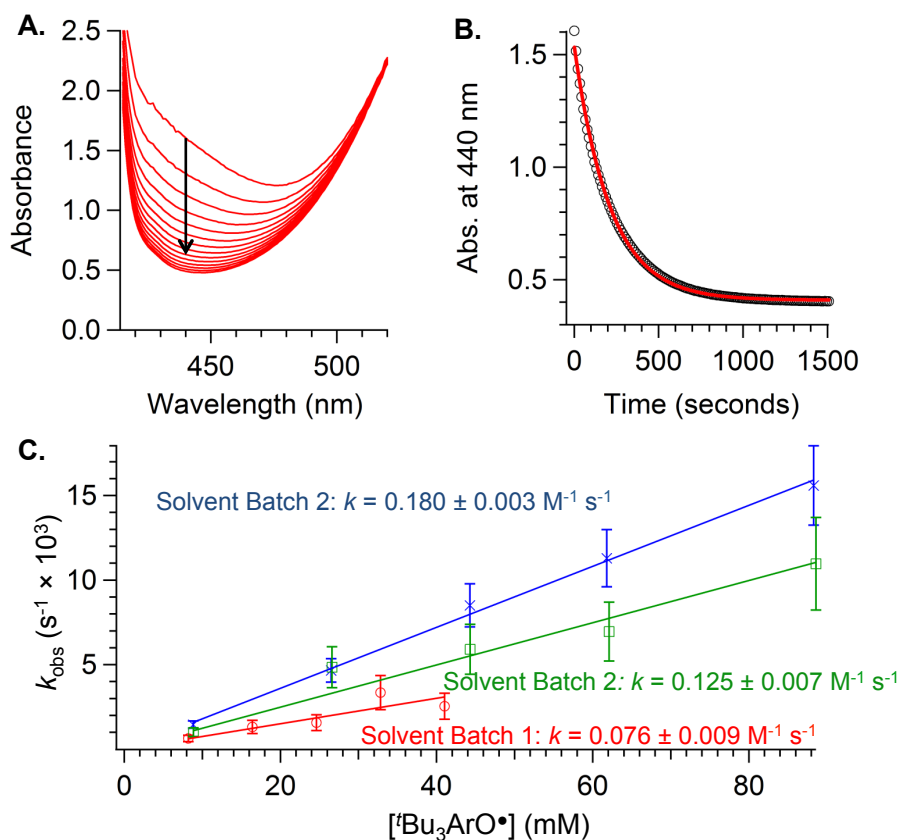

**Figure S26.** (A) Selected optical spectra of the reaction between  $\text{Tp}^{\text{tBu}}\text{Cu}^{\text{II}}\text{OCH}_2\text{CF}_3$  (0.5 mM) with  ${}^t\text{Bu}_3\text{ArO}^\bullet$  (26.5 mM). (B) Kinetic trace of the same reaction monitored at 440 nm. The raw data is indicated by black circles ( $\circ$ ) and the solid red line represents the single exponential fit. (C) The pseudo-first order plot of the reaction between  $\text{Tp}^{\text{tBu}}\text{Cu}^{\text{II}}\text{OCH}_2\text{CF}_3$  and  ${}^t\text{Bu}_3\text{ArO}^\bullet$  collected with three different solvent batches under similar conditions.

**10.11.** Kinetic Traces of  $\text{Tp}^{\text{tBu}}\text{Cu}^{\text{II}}\text{-OCH}_2\text{CF}_3$  and  $\text{Tp}^{\text{tBu}}\text{Cu}^{\text{II}}\text{-OCD}_2\text{CF}_3$  with 1 eq  ${}^t\text{Bu}_3\text{ArO}^\bullet$  Using the Same Batch of Solvent ( $\text{DCM-}d_2/1\% \text{ MeCN-}d_3$  (v/v)).

The kinetic trace for these reactions was obtained by preparing a 15.3 mM  $\text{DCM-}d_2/1\% \text{ MeCN-}d_3$  (v/v) solution of either  $\text{Tp}^{\text{tBu}}\text{Cu}^{\text{II}}\text{-OCH}_2\text{CF}_3$  or  $\text{Tp}^{\text{tBu}}\text{Cu}^{\text{II}}\text{-OCD}_2\text{CF}_3$  with one eq TEMPO in a J. Young NMR tube in a nitrogen filled glovebox. Shortly after mixing (*ca.* 5 minutes),  ${}^1\text{H}$  NMR spectra were collected at 5 minute intervals until the reaction had reached completion. Only 1 scan per spectrum was collected in order to ensure complete T1 relaxation was reached between scans. Reaction progress was monitored by integration of the  $\text{Tp}^{\text{tBu}}\text{Cu}^{\text{I}}\text{-MeCN-}d_3$  pyrazole peak at  $\delta$  5.95 ppm vs. a fluorobenzene internal standard. The same experiment was performed with the  $\text{Tp}^{\text{tBu}}\text{Cu}^{\text{II}}\text{-OCD}_2\text{CF}_3$  isotopologue and is also shown. Within the error of the experiment ( $\pm \sim 10\%$ ), no kinetic isotope effect is observed.

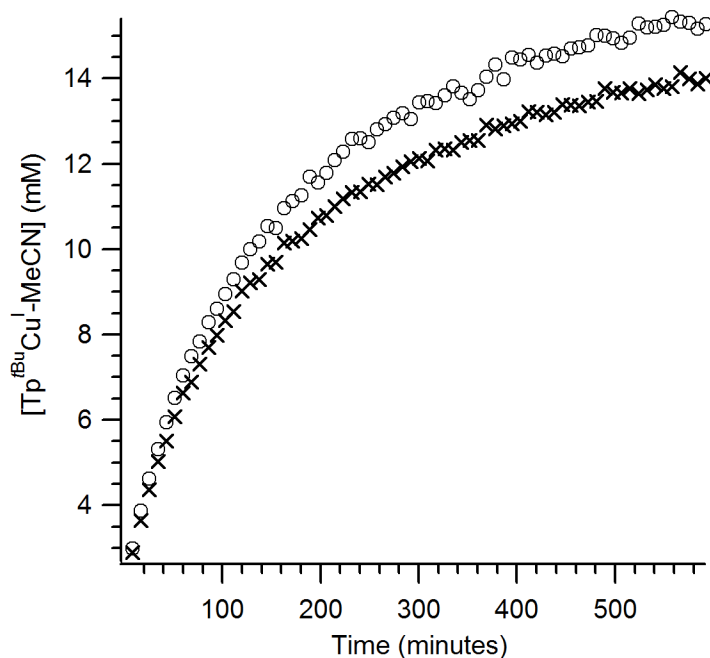

**Figure S27.** Kinetic Trace for the Reactions of 15.3 mM  $\text{Tp}^{\text{tBu}}\text{Cu}^{\text{II}}\text{-OCH}_2\text{CF}_3$  (o) and  $\text{Tp}^{\text{tBu}}\text{Cu}^{\text{II}}\text{-OCD}_2\text{CF}_3$  (x) with 1 eq  ${}^t\text{Bu}_3\text{ArO}^\bullet$  in  $\text{DCM-}d_2/1\% \text{ MeCN-}d_3$  (v/v).

## 11. Select Reaction and Product Characterization of (2).

**11.1.**  $^1\text{H}$  NMR of the completed reaction between 15.3 mM  $\text{Tp}^{\text{tBuMe}}\text{Cu}^{\text{II}}\text{-OCH}_2\text{CF}_3$  and 1 eq TEMPO-H in  $\text{DCM-}d_2/1\%$   $\text{MeCN-}d_3$  (v/v).

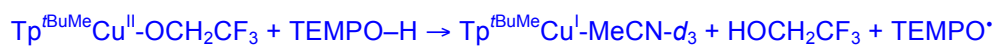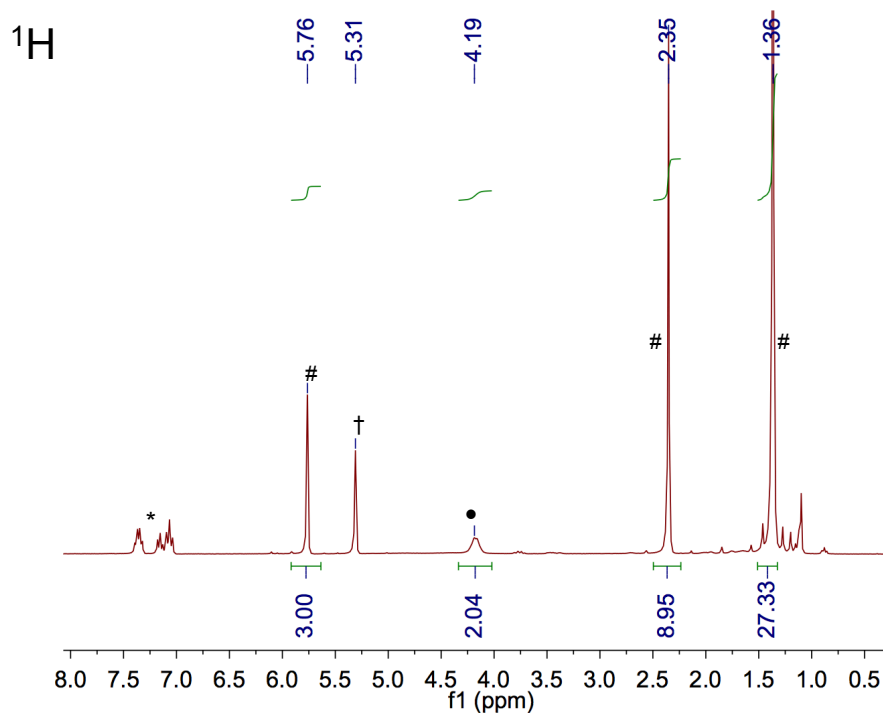

**Figure S28.**  $^1\text{H}$  NMR spectrum of the completed reaction between 15.3 mM  $\text{Tp}^{\text{tBuMe}}\text{Cu}^{\text{II}}\text{-OCH}_2\text{CF}_3$  and 1 eq TEMPO-H in  $\text{DCM-}d_2/1\%$   $\text{MeCN-}d_3$  (v/v). Signals for  $\text{Tp}^{\text{tBuMe}}\text{Cu}^{\text{I}}\text{-MeCN-}d_3$  are shown with #, TFE is shown with •, residual solvent signal with † and fluorobenzene internal standard with \*.

**11.2.**  $^1\text{H}$  NMR of the completed reaction between 15.3 mM  $\text{Tp}^{\text{tBuMe}}\text{Cu}^{\text{II}}\text{-OCH}_2\text{CF}_3$  and 1 eq  $\text{tBu}_3\text{ArO-H}$  in  $\text{DCM-}d_2/1\%$   $\text{MeCN-}d_3$  (v/v).

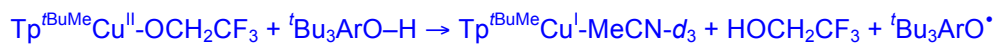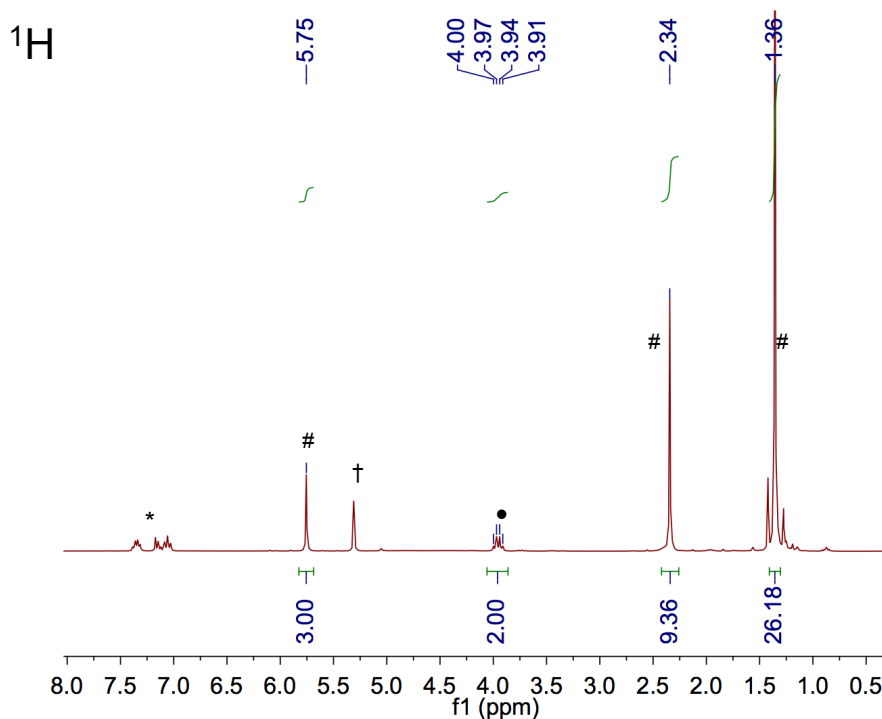

**Figure S29.**  $^1\text{H}$  NMR spectrum of the completed reaction between 15.3 mM  $\text{Tp}^{\text{tBuMe}}\text{Cu}^{\text{II}}\text{-OCH}_2\text{CF}_3$  and 1 eq  $\text{tBu}_3\text{ArO-H}$  in  $\text{DCM-}d_2/1\%$   $\text{MeCN-}d_3$  (v/v). Signals for  $\text{Tp}^{\text{tBuMe}}\text{Cu}^{\text{I}}\text{-MeCN-}d_3$  are shown with #, TFE is shown with •, residual solvent signal with † and fluorobenzene internal standard with \*.

### 11.3 $^1\text{H}$ NMR of the completed reaction between 15.3 mM $\text{Tp}^{\text{tBuMe}}\text{Cu}^{\text{II}}\text{-OCH}_2\text{CF}_3$ and 1 eq ABNO-H in toluene- $d_8$

The reaction between  $\text{Tp}^{\text{tBuMe}}\text{Cu}^{\text{II}}\text{-OCH}_2\text{CF}_3$  and ABNO-H was carried out in an NMR tube with 15.3 mM  $\text{Tp}^{\text{tBuMe}}\text{Cu}^{\text{II}}\text{-OCH}_2\text{CF}_3$  and one equivalent of ABNO-H. After the reaction was complete (as determined by color change) the optical spectrum of the solution was collected. The resulting spectrum overlaid with an independently collected spectrum of 15.3 mM ABNO in toluene, indicating ABNO was generated quantitatively in this reaction.

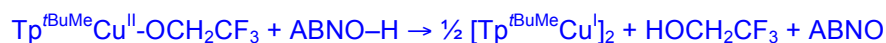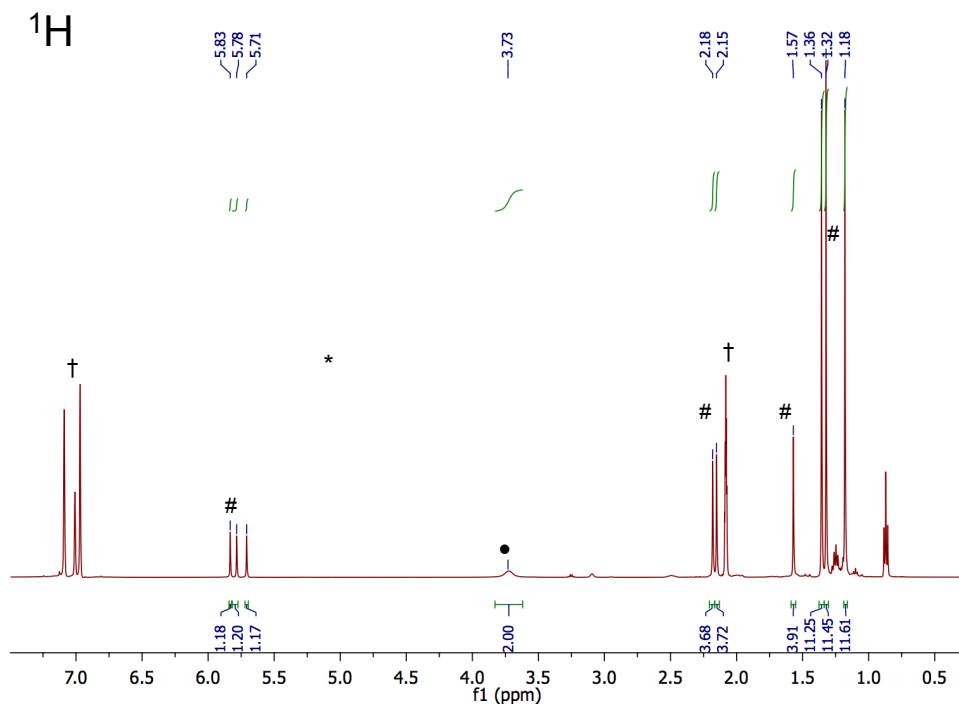

**Figure S30**  $^1\text{H}$  NMR spectrum of the completed reaction between 15.3 mM  $\text{Tp}^{\text{tBuMe}}\text{Cu}^{\text{II}}\text{-OCH}_2\text{CF}_3$  and 1 eq  $\text{tBu}_3\text{ArO-H}$  in toluene- $d_8$ . Signals for  $[\text{Tp}^{\text{tBuMe}}\text{Cu}^{\text{I}}]_2$  are shown by #, TFE is shown with • and residual solvent signal with †.



**11.4 Kinetic Measurement Details for the Disproportionation Reaction of 15.3 mM  $\text{Tp}^{\text{tBu}}\text{Cu}^{\text{II}}\text{-OCH}_2\text{CF}_3$  catalyzed with 1 eq TEMPO in  $\text{DCM-}d_2/1\% \text{MeCN-}d_3$  (v/v)**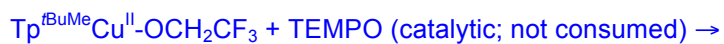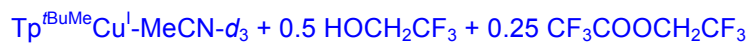

Kinetics for this reaction were recorded in the same fashion as described above in 8.6, monitoring the appearance of the pyrazole-4-H signal integrated against a known concentration of fluorobenzene internal standard.

## 12. Select Reaction and Product Characterization of (3)

$\text{Tp}^{\text{tBu}}\text{Cu}^{\text{II}}\text{-OCH}(\text{CH}_3)\text{CF}_3$  displays similar reactivity to (1) and (2) in the experiments attempted but also undergoes a competing decomposition reaction.

**11.1** Reaction of 15.3 mM  $\text{Tp}^{\text{tBu}}\text{Cu}^{\text{II}}\text{-OCH}(\text{CH}_3)\text{CF}_3$  with 1 equivalent of TEMPO-H in  $\text{DMC-}d_2/1\% \text{MeCN-}d_3$  (v/v).

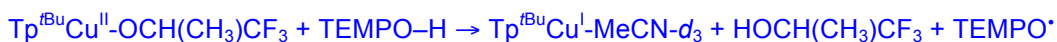

This reaction occurs instantaneously and the products have been quantified by  $^1\text{H}$  and  $^{19}\text{F}$  NMR. The  $\text{HOCH}(\text{CH}_3)\text{CF}_3$  signal is covered by the  $^{\text{tBu}}$  signals from  $\text{Tp}^{\text{tBu}}\text{Cu}^{\text{I}}\text{-MeCN-}d_3$ .

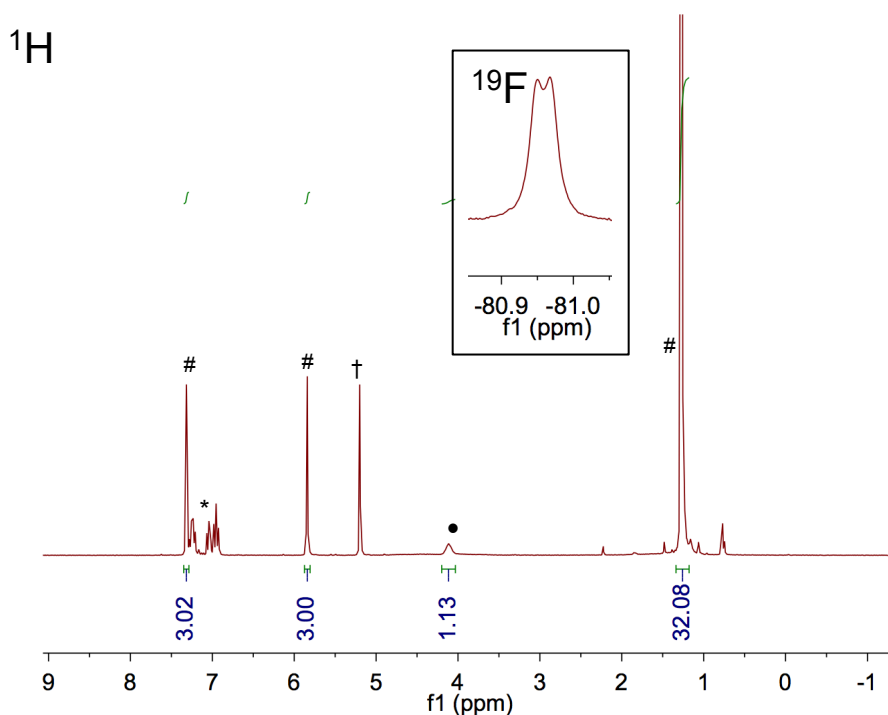

**Figure S31.**  $^1\text{H}$  NMR spectrum of the completed reaction between 15.3 mM  $\text{Tp}^{\text{tBu}}\text{Cu}^{\text{II}}\text{-OCH}(\text{CH}_3)\text{CF}_3$  and 1 equivalent of TEMPO-H showing the generation of  $\text{Tp}^{\text{tBu}}\text{Cu}^{\text{I}}\text{-MeCN-}d_3$  and  $\text{HOCH}(\text{CH}_3)\text{CF}_3$  (•). The residual solvent signal is shown by † and the fluorobenzene internal standard is shown by \*. The inset displays the  $^{19}\text{F}$  NMR signal for  $\text{HOCH}(\text{CH}_3)\text{CF}_3$ .

**12.2.** Reaction of 15.3 mM  $\text{Tp}^{\text{tBu}}\text{Cu}^{\text{II}}\text{-OCH}(\text{CH}_3)\text{CF}_3$  with 1 equivalent of  ${}^t\text{Bu}_3\text{ArO-H}$  in  $\text{DMC-}d_2/1\%$   $\text{MeCN-}d_3$  (v/v).

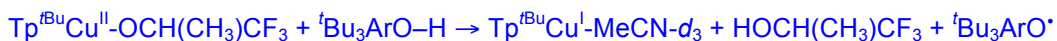

Reaction went to completion overnight. The products were confirmed by  ${}^1\text{H}$  NMR with an internal standard and optically. The  $\text{HOCH}(\text{CH}_3)\text{CF}_3$  signal is covered by the  ${}^t\text{Bu}$  signal of  $\text{Tp}^{\text{tBu}}\text{Cu}^{\text{I}}\text{-MeCN-}d_3$ .

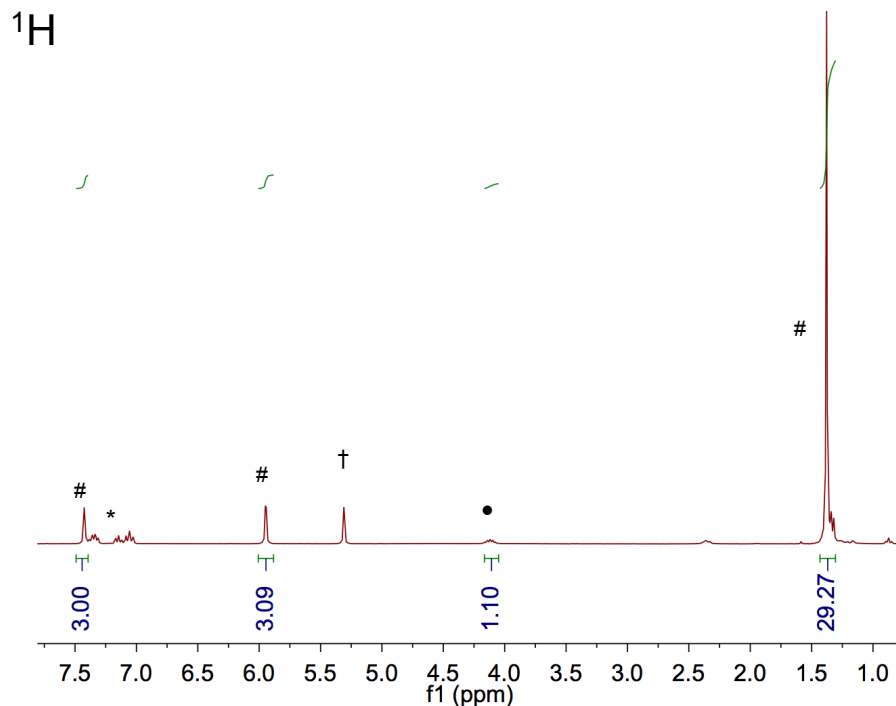

**Figure S32.**  ${}^1\text{H}$  NMR spectrum of the completed reaction between 15.3 mM  $\text{Tp}^{\text{tBu}}\text{Cu}^{\text{II}}\text{-OCH}(\text{CH}_3)\text{CF}_3$  and 1 equivalent of  ${}^t\text{Bu}_3\text{ArO-H}$  showing the generation of  $\text{Tp}^{\text{tBu}}\text{Cu}^{\text{I}}\text{-MeCN-}d_3$  and  $\text{HOCH}(\text{CH}_3)\text{CF}_3$  (•). The residual solvent signal is shown by † and the fluorobenzene internal standard is shown by \*.

### 12.3. $^1\text{H}$ and $^{19}\text{F}$ NMR Spectra of the Decomposition of $\text{Tp}^{\text{tBu}}\text{Cu}^{\text{II}}\text{-OCH}(\text{CH}_3)\text{CF}_3$ in $\text{DCM-}d_2/1\%$ $\text{MeCN-}d_3$ (v/v).

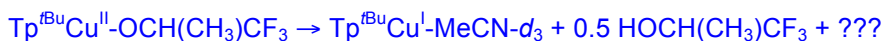

Decomposition of  $\text{Tp}^{\text{tBu}}\text{Cu}^{\text{II}}\text{-OCH}(\text{CH}_3)\text{CF}_3$  occurred overnight in either  $\text{DCM-}d_2/1\%$   $\text{MeCN-}d_3$  (v/v) or toluene- $d_8$ . When 1 equivalent TEMPO was added to  $\text{Tp}^{\text{tBu}}\text{Cu}^{\text{II}}\text{-OCH}(\text{CH}_3)\text{CF}_3$ , the same decomposition products were observed but the reaction only required  $\sim 5$  hours to reach completion. We were able to identify  $\text{Tp}^{\text{tBu}}\text{Cu}^{\text{I}}\text{-MeCN-}d_3$  and 0.5 equivalents of TFE as products but were unable to determine the identity of the other remaining product(s). Comparison of the  $^{19}\text{F}$  NMR spectra of decomposition products of racemic or (*R*) enriched  $\text{Tp}^{\text{tBu}}\text{Cu}^{\text{II}}\text{-OC}^*\text{H}(\text{CH}_3)\text{CF}_3$  indicates the unidentified product is diastereomeric (Fig S34).

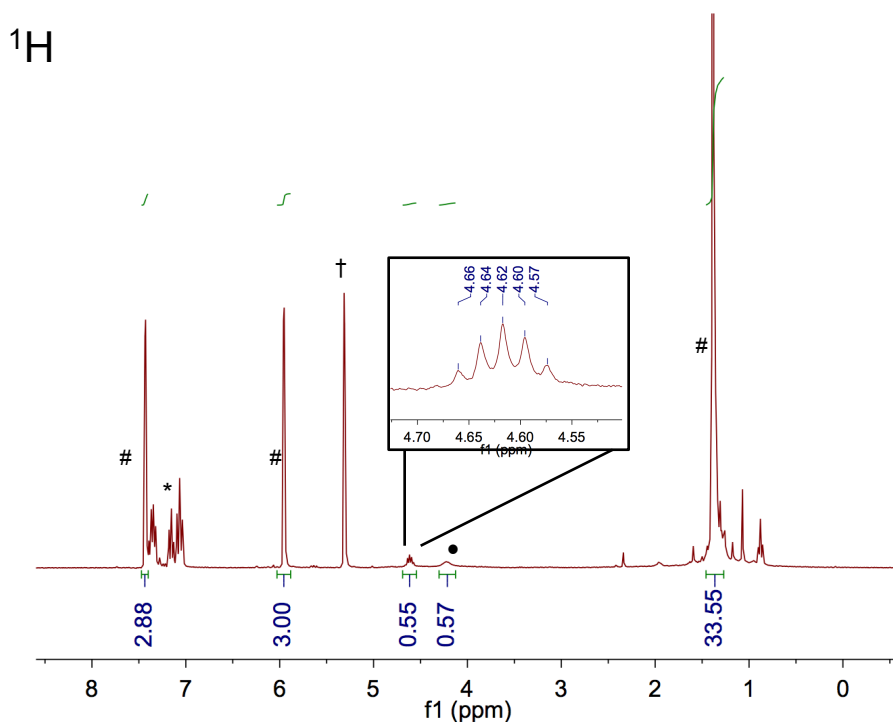

**Figure S33.**  $^1\text{H}$  NMR spectrum (300 MHz) of the decomposition reaction of 15.3 mM  $\text{Tp}^{\text{tBu}}\text{Cu}^{\text{II}}\text{-OCH}(\text{CH}_3)\text{CF}_3$  in  $\text{DCM-}d_2/1\%$   $\text{MeCN-}d_3$  (v/v).  $\text{Tp}^{\text{tBu}}\text{Cu}^{\text{I}}\text{-MeCN-}d_3$  is shown by #, trifluoroisopropanol by •, and residual solvent signal by †. The inset shows a close-up of the signal arising from the unknown product.

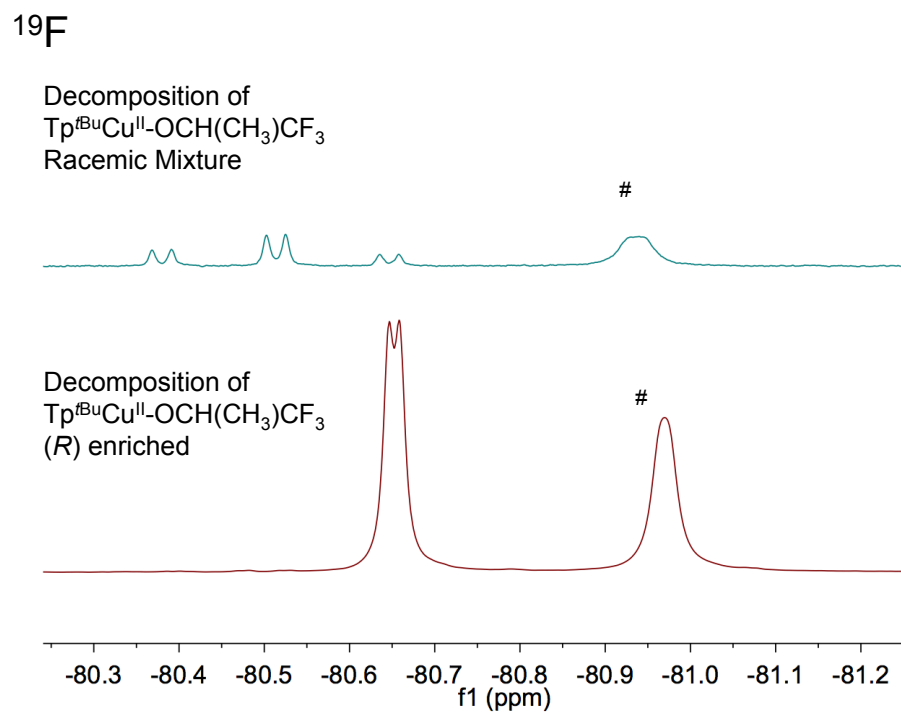

**Figure S34.**  $^{19}\text{F}$  NMR spectra (282 MHz top; 470 MHz bottom) of the decomposition reaction of 15.3 mM or racemic  $\text{Tp}^{\text{tBu}}\text{Cu}^{\text{II}}\text{-OC}^*\text{H}(\text{CH}_3)\text{CF}_3$  (top) or (*R*) enriched  $\text{Tp}^{\text{tBu}}\text{Cu}^{\text{II}}\text{-OC}^*\text{H}(\text{CH}_3)\text{CF}_3$  (bottom) in  $\text{DCM-}d_2/1\%$   $\text{MeCN-}d_3$  (v/v). Trifluoroisopropoxide is shown with #.

### 13. Thermochemical Analysis

#### 13.1. Background

The interconversion between gas phase bond dissociation enthalpy (BDE) and bond dissociation free energy (BDFE) of X–H bonds can be achieved by using equation S1, using  $S^\circ(\text{H}^\bullet) = 27.42 \text{ cal K}^{-1} \text{ mol}^{-1}$ .<sup>8</sup>

$$\text{BDFE}_g(\text{X-H}) = \text{BDE}_g(\text{X-H}) - TS^\circ(\text{H}^\bullet) - T\{S^\circ(\text{X}^\bullet) - S^\circ(\text{X-H})\} \quad (\text{S1})$$

Typically for small molecules,  $S^\circ(\text{X}^\bullet) \cong S^\circ(\text{X-H})$  because they are generally very similar in size and structure. With this simplification, the relationship between  $\text{BDFE}_g$  and  $\text{BDE}_g$  at 298K is simplified to equation S2.<sup>8</sup>

$$\text{BDFE}_g(\text{X-H}) = [\text{BDE}_g(\text{X-H}) - 8.2 \text{ kcal mol}^{-1}] \pm 0.5 \text{ kcal mol}^{-1} \quad (\text{S2})$$

The interconversion between X–H gas phase BDFEs and solution BDFEs of can be achieved by accounting for the free energy of solvation of  $\text{H}^\bullet$  and the difference in free energy of solvation of XH and  $\text{X}^\bullet$  (equation S3).<sup>8</sup>

$$\text{BDFE}_{\text{solv}} = \text{BDFE}_g + \Delta G^\circ_{\text{solv}}(\text{H}^\bullet) + [\Delta G^\circ_{\text{solv}}(\text{X}^\bullet) - \Delta G^\circ_{\text{solv}}(\text{XH})] \quad (\text{S3})$$

$\Delta G^\circ_{\text{solv}}(\text{H}^\bullet)$  in toluene is  $4.77 \text{ kcal mol}^{-1}$  (calculated from the solubility of  $\text{H}^\bullet$  [assumed to be the same as  $\text{H}_2^6$ ] at STP (equation S4)).<sup>8,9</sup>

$$\Delta G^\circ_{\text{solv}}(\text{H}^\bullet) = -RT \ln(K_{\text{solv}}) \quad (\text{S4})$$

In aprotic solvents like toluene, the  $[\Delta G^\circ_{\text{solv}}(\text{X}^\bullet) - \Delta G^\circ_{\text{solv}}(\text{XH})]$  term is taken as the free energy of the XH–solvent hydrogen bond. This can be calculated using empirically determined H-bonding acidity ( $\alpha_2^{\text{H}}$ ) and basicity parameters ( $\beta_2^{\text{H}}$ ) described by Abraham (equation S5).<sup>10</sup>

$$\Delta G^\circ_{\text{solv}} = -10.02 \alpha_2^{\text{H}} \beta_2^{\text{H}} - 1.492 \quad (\text{S5})$$

The  $\beta_2^{\text{H}}$  parameter in toluene is 0.14.<sup>11</sup> Values for  $\alpha_2^{\text{H}}$  have been extensively tabulated by Abraham.<sup>12</sup>

A more complete description of these conversions and the use of Abraham's model of interconverting solution BDFE values can be found in references 11.

### 13.2. Thermochemical Conversion Calculations

#### Calculating the BDFE of the first C–H bond of 1,4-cyclohexadiene in toluene:

The reported gas phase BDFE of the first C–H bond in 1,4-cyclohexadiene is 67.8 kcal mol<sup>-1</sup>.<sup>8</sup>

The first C–H BDFE in toluene can be calculated using the reported gas phase BDFE of 67.8 kcal mol<sup>-1</sup>. Using this value in equation S3 with the previously described  $\Delta G^\circ_{\text{tol}}(\text{H}^\bullet) = 4.77$  and assuming  $\alpha_2^{\text{H}} \cong 0$ ,<sup>8</sup> the C–H BDFE<sub>tol</sub> is calculated to be 72.6 ± 3 kcal mol<sup>-1</sup>.

#### Calculating the BDFE of the O–H bond of ABNO–H in toluene:

The gas phase BDE of ABNO–H is 76.2 kcal mol<sup>-1</sup>.<sup>10</sup> This value is converted to a gas phase BDFE using equation S2: O–H BDFE<sub>g</sub> = 68 ± 2 kcal mol<sup>-1</sup>.

Using this value in equation S3 with the previously described  $\Delta G^\circ_{\text{tol}}(\text{H}^\bullet) = 4.77$ , toluene  $\beta_2^{\text{H}} = 0.14$ , and reported  $\alpha_2^{\text{H}} = 0.39$  for TEMPO–H (assumed to be the same for ABNO–H),<sup>8</sup> the BDFE<sub>tol</sub> value is calculated: O–H BDFE<sub>tol</sub> = 70.7 ± 3 kcal mol<sup>-1</sup>.

#### Calculating the BDFE of the O–H bond in 2,2,2-trifluoroethanol, TFE, in toluene.

The gas phase BDE of CF<sub>3</sub>CH<sub>2</sub>O–H is 107.0 kcal mol<sup>-1</sup>.<sup>12</sup> This value is converted to a gas phase BDFE using equation S2: O–H BDFE<sub>g</sub> = 98.8 ± 2 kcal mol<sup>-1</sup>.

Using this value in equation S3 with the previously described  $\Delta G^\circ_{\text{tol}}(\text{H}^\bullet) = 4.77$ , toluene  $\beta_2^{\text{H}} = 0.14$ , and reported  $\alpha_2^{\text{H}} = 0.567$  for TFE,<sup>10</sup> the BDFE<sub>tol</sub> value is calculated: O–H BDFE<sub>tol</sub> = 101.3 ± 3 kcal mol<sup>-1</sup>.

#### Calculating the gas phase $\Delta G^\circ_{\text{dehyd}}$ of 2,2,2-trifluoroethanol.

The  $\Delta H^\circ_{\text{g,dehyd}}$  can be calculated from the standard heats of formation of 2,2,2-trifluoroethanol (-211.3 kcal mol<sup>-1</sup>)<sup>13</sup> and trifluoroacetaldehyde (-185.8 kcal mol<sup>-1</sup>; calculated).<sup>13</sup>

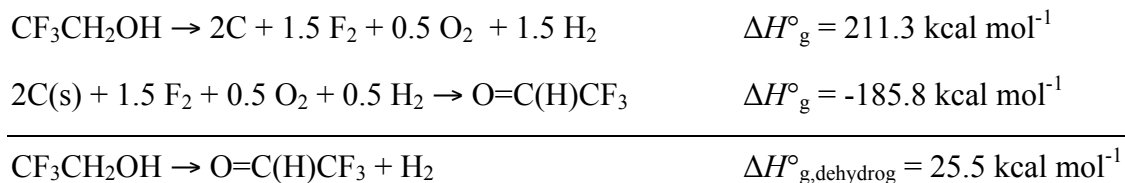

The enthalpy of dehydrogenation,  $\Delta H^\circ_{\text{g,dehydrg}}$ , can be converted to a free energy of formation at 298K from the standard molar entropies of  $\text{H}_2$  ( $S^\circ_{\text{g}} = 31.2 \text{ cal mol}^{-1} \text{ K}^{-1}$ ),<sup>14</sup> ethanol ( $S^\circ_{\text{g}} = 67.3 \text{ cal mol}^{-1} \text{ K}^{-1}$ )<sup>14</sup> and acetaldehyde ( $S^\circ_{\text{g}} = 63.0 \text{ cal mol}^{-1} \text{ K}^{-1}$ )<sup>14</sup> (taken to be the same as for 2,2,2-trifluoroethanol and trifluoroacetaldehyde).

$$\{S^\circ_{\text{g}}(\text{H}_2) + S^\circ_{\text{g}}(\text{acetaldehyde})\} - S^\circ_{\text{g}}(\text{ethanol}) = 26.9 \text{ cal mol}^{-1} \text{ K}^{-1}$$

$$\text{Thus, at 298 K, } \Delta G^\circ_{\text{g,dehydrg}}(2,2,2\text{-trifluoroethanol}) = 17.5 \pm 3 \text{ kcal mol}^{-1}$$

Other quoted BDFE values in toluene (taken to be the same as in benzene) are found in reference 8.

(8) Warren, J. J.; Tronic, T. A.; Mayer, J. M. *Chem. Rev.* **2010**, 110, 7062.

(9) Brunner, E. J. *J. Chem. Eng. Data*, **1985**, 30, 269.

(10) Abraham, M. H.; Grellier, P. L.; Prior, D. V.; Duce, P. P. *J. Chem. Soc. Perkin Trans. II*, **1989**, 699.

(11) Warren, J. J.; Mayer, J. M. *Proc. Natl. Acad. Sci.* **2010**, 107, 5282.

(12) Luo, Y. -R. *Comprehensive Handbook of Chemical Bond Energies*; CRC Press: Boca Raton, FL, 2007.

(13) Bartmess, J. E.; Liebman, J. *Struct. Chem.* **2013**, 24, 2035.

(14) *CRC Handbook of Chemistry and Physics*, 95<sup>th</sup> ed. CRC Press: Boca Raton, FL, 2014-2015.



## 14. Computational Details

The Gaussian 09 suite of programs was used for the calculation reported in this paper.<sup>15</sup> Geometry optimizations for <sup>t</sup>Bu<sub>3</sub>CHDO-TFE, <sup>t</sup>Bu<sub>3</sub>ArOH and trifluoroacetaldehyde were performed at M06/6-311+g(d,p) level<sup>16</sup> using density functional theory. Based on the results of geometry optimizations in the gas phase at the M06/6-311+G(d,p) level, all stable structures were fully re-optimized with the use of the PCM model of solvent (toluene) at the same level. Vibrational frequency calculations were carried out to confirm the stable structures for both gas-phase computation and SCRF computation.

(15) Frisch, M. J.; Trucks, G. W.; Schlegel, H. B.; Scuseria, G. E.; Robb, M. A.; Cheeseman, J. R.; Scalmani, G.; Barone, V.; Mennucci, B.; Petersson, G. A.; Nakatsuji, H.; Caricato, M.; Li, X.; Hratchian, H. P.; Izmaylov, A. F.; Bloino, J.; Zheng, G.; Sonnenberg, J. L.; Hada, M.; Ehara, M.; Toyota, K.; Fukuda, R.; Hasegawa, J.; Ishida, M.; Nakajima, T.; Honda, Y.; Kitao, O.; Nakai, H.; Vreven, T.; Montgomery, J. A., Jr.; Peralta, J. E.; Ogliaro, F.; Bearpark, M.; Heyd, J. J.; Brothers, E.; Kudin, K. N.; Staroverov, V. N.; Kobayashi, R.; Normand, J.; Raghavachari, K.; Rendell, A.; Burant, J. C.; Iyengar, S. S.; Tomasi, J.; Cossi, M.; Rega, N.; Millam, J. M.; Klene, M.; Knox, J. E.; Corss, J. B.; Bakken, V.; Adamo, C.; Jaramillo, J.; Gomperts, R.; Stratmann, R. E.; Yazyev, O.; Austin, A. J.; Cammi, R.; Pomelli, C.; Ochterski, J. W.; Martin, R. L.; Morokuma, K.; Zakrzewski, V. G.; Voth, G. A.; Salvador, P.; Dannenberg, J. J.; Dapprich, S.; Daniels, A. D.; Farkas, O.; Foresman, J. B.; Ortiz, J. V.; Cioslowski, J.; Fox, D. J. GAUSSIAN 09, Revision A.01, Gaussian, Inc., Wallingford CT, 2009.

(16) (a) Zhao, Y.; Truhlar, D. G. *Acc. Chem. Res.* **2008**, 41, 157-167. (b) Valero, R.; Costa, R.; Moreira, I. P. R.; Truhlar, D. G.; IIIas, F. *J. Chem. Phys.* **2008**, 128, 114103.

### Energetic parameters

**Table S6.** Calculated energetic parameters for <sup>t</sup>Bu<sub>3</sub>CHDO-TFE, <sup>t</sup>Bu<sub>3</sub>ArOH and trifluoroacetaldehyde at M06/6-311+G(d,p) level in the gas phase and in SCRF.

|                         | trifluoroacetaldehyde | <sup>t</sup> Bu <sub>3</sub> ArOH | <sup>t</sup> Bu <sub>3</sub> CHDO-TFE |
|-------------------------|-----------------------|-----------------------------------|---------------------------------------|
| <i>In the gas phase</i> |                       |                                   |                                       |
| <b>E</b>                | -451.462655           | -778.367796                       | -1229.823177                          |
| <b>H</b>                | -451.461711           | -778.366852                       | -1229.822233                          |
| <b>G</b>                | -451.497539           | -778.437921                       | -1229.906142                          |
| <i>SCRF</i>             |                       |                                   |                                       |
| <b>E</b>                | -451.465090           | -778.369966                       | -1229.826328                          |
| <b>H</b>                | -451.464146           | -778.369022                       | -1229.825384                          |
| <b>G</b>                | -451.499992           | -778.440253                       | -1229.908652                          |

**E**: sum of electronic and thermal energies; **H**: Sum of electronic and thermal enthalpies; **G**: Sum of electronic and thermal free energies. All energies reported in units of Hartrees.

**Cartesian Coordinates****Gas phase calculation***Trifluoroacetaldehyde*

|   |             |             |             |
|---|-------------|-------------|-------------|
| C | 0.36168200  | 0.00826600  | 0.00002400  |
| C | -1.06604000 | -0.56113300 | 0.00010700  |
| H | -1.08079400 | -1.67185100 | 0.00023100  |
| F | 1.00676800  | -0.43988900 | -1.07877800 |
| F | 0.38509700  | 1.32301600  | -0.00015500 |
| F | 1.00689100  | -0.43960700 | 1.07881400  |
| O | -2.03523200 | 0.12467200  | 0.00000600  |

*<sup>1</sup>Bu<sub>3</sub>ArOH*

|   |             |             |             |
|---|-------------|-------------|-------------|
| C | -1.50590000 | -0.37038500 | -0.00015600 |
| C | -0.53214000 | -1.35597500 | -0.00025000 |
| C | 0.83642300  | -1.07329600 | -0.00018800 |
| C | 1.21614100  | 0.27771600  | -0.00011700 |
| C | 0.26641000  | 1.31838600  | -0.00001400 |
| C | -1.07266500 | 0.95353800  | -0.00000400 |
| H | -0.84317700 | -2.39239300 | -0.00033700 |
| H | -1.82188800 | 1.73774200  | 0.00015100  |
| O | 2.52848600  | 0.66155500  | -0.00004000 |
| C | 1.86794900  | -2.21323900 | 0.00003000  |
| C | 2.73538800  | -2.16812100 | -1.26814500 |
| C | 2.73490100  | -2.16773100 | 1.26851200  |
| C | 1.20331100  | -3.59056500 | 0.00002100  |
| H | 2.10350700  | -2.27455800 | -2.15647400 |
| H | 3.30897600  | -1.24575600 | -1.40446900 |
| H | 3.45316500  | -2.99679700 | -1.26142800 |
| H | 2.10266400  | -2.27398000 | 2.15660800  |
| H | 3.45268800  | -2.99640000 | 1.26232300  |
| H | 3.30829300  | -1.24522500 | 1.40464400  |
| H | 1.98057200  | -4.36266500 | 0.00008500  |
| H | 0.58340100  | -3.74786500 | 0.88882800  |
| H | 0.58348000  | -3.74791100 | -0.88882100 |
| C | 0.68299900  | 2.79378700  | 0.00001200  |
| C | 1.49631400  | 3.12005500  | 1.25858100  |
| C | 1.49627600  | 3.11993300  | -1.25861500 |
| C | -0.52741400 | 3.72664200  | -0.00001200 |
| H | 0.90587200  | 2.91531700  | 2.15960600  |
| H | 2.41830300  | 2.54048400  | 1.31242100  |
| H | 1.75957000  | 4.18492000  | 1.26513400  |
| H | 0.90587700  | 2.91492300  | -2.15960800 |
| H | 1.75939200  | 4.18483000  | -1.26537800 |

|   |             |             |             |
|---|-------------|-------------|-------------|
| H | 2.41833500  | 2.54046500  | -1.31232100 |
| H | -0.17603400 | 4.76412600  | 0.00010000  |
| H | -1.15244700 | 3.59220600  | -0.89002600 |
| H | -1.15258300 | 3.59205600  | 0.88988200  |
| C | -3.00188700 | -0.67394400 | -0.00001100 |
| C | -3.64809200 | -0.07035400 | 1.25080800  |
| C | -3.64883300 | -0.06872700 | -1.24965000 |
| C | -3.29342200 | -2.17156600 | -0.00093800 |
| H | -3.20541100 | -0.49462600 | 2.15939700  |
| H | -3.52250800 | 1.01618300  | 1.29500000  |
| H | -4.72436300 | -0.28190300 | 1.26482100  |
| H | -3.20665400 | -0.49171700 | -2.15908000 |
| H | -4.72509000 | -0.28037900 | -1.26331700 |
| H | -3.52345400 | 1.01788300  | -1.29248700 |
| H | -4.37703100 | -2.33420000 | -0.00090800 |
| H | -2.88691500 | -2.66680400 | -0.89026700 |
| H | -2.88669800 | -2.66798000 | 0.88762900  |
| H | 3.09772100  | -0.10933900 | -0.00056900 |

*<sup>1</sup>Bu<sub>3</sub>CHDO-TFE*

|   |             |             |             |
|---|-------------|-------------|-------------|
| C | 0.25105800  | 0.88002900  | 1.34659600  |
| C | 0.51960100  | -1.42530200 | 0.52669900  |
| C | 1.58950100  | -1.03311900 | -0.17652900 |
| C | 1.77265600  | 0.39963500  | -0.44859600 |
| C | 1.11116200  | 1.35823800  | 0.21673400  |
| H | 0.34329000  | -2.47627800 | 0.72101500  |
| H | 2.48833100  | 0.67667800  | -1.21828200 |
| C | -1.35447900 | -0.99946600 | 2.20155000  |
| C | -0.46155300 | -1.40723600 | 3.37330400  |
| C | -2.39034200 | 0.02405900  | 2.67760600  |
| C | -2.13260500 | -2.22526800 | 1.71260400  |
| H | 0.25837100  | -2.18542300 | 3.09519900  |
| H | 0.08994600  | -0.55308000 | 3.77392400  |
| H | -1.08496200 | -1.81291700 | 4.17841500  |
| H | -3.01950100 | 0.35978700  | 1.84764500  |
| H | -3.04161600 | -0.45022600 | 3.42071000  |
| H | -1.92367700 | 0.89538100  | 3.13967600  |
| H | -2.74151300 | -2.60994300 | 2.53817000  |
| H | -2.81965800 | -1.96745600 | 0.89996500  |
| H | -1.49203600 | -3.05017700 | 1.38279100  |
| C | 2.60923500  | -1.99269600 | -0.76549300 |
| C | 2.34647300  | -3.43873800 | -0.36196700 |
| C | 2.54770500  | -1.90457400 | -2.29470800 |
| C | 4.00885700  | -1.60578300 | -0.27858400 |
| H | 2.37586200  | -3.56796200 | 0.72583000  |

|   |             |             |             |
|---|-------------|-------------|-------------|
| H | 1.37769800  | -3.79762100 | -0.72798200 |
| H | 3.11848900  | -4.08544500 | -0.79272900 |
| H | 2.77982200  | -0.90212600 | -2.66839600 |
| H | 3.27278800  | -2.59586600 | -2.73945600 |
| H | 1.55048500  | -2.17914600 | -2.65970700 |
| H | 4.75517000  | -2.28798700 | -0.70172600 |
| H | 4.28697200  | -0.58831800 | -0.57145800 |
| H | 4.07147100  | -1.66930300 | 0.81357900  |
| C | 1.25906200  | 2.84838400  | -0.02814600 |
| C | 2.11037200  | 3.48838600  | 1.07515800  |
| C | 1.93010800  | 3.11900000  | -1.37121200 |
| C | -0.13169700 | 3.49124900  | -0.05555400 |
| H | 1.64895300  | 3.37273000  | 2.05729800  |
| H | 3.10748000  | 3.03351600  | 1.10584200  |
| H | 2.23211300  | 4.55904400  | 0.87012300  |
| H | 1.38235200  | 2.65142000  | -2.19825900 |
| H | 1.95164100  | 4.19883100  | -1.55288800 |
| H | 2.96794200  | 2.76769400  | -1.39635200 |
| H | -0.03859200 | 4.56585600  | -0.25003300 |
| H | -0.74870000 | 3.05631000  | -0.85059200 |
| H | -0.65791800 | 3.36663800  | 0.89423700  |
| C | -0.49083500 | -0.43671900 | 1.04519500  |
| O | 0.15623600  | 1.49258900  | 2.38025300  |
| O | -1.40988300 | 0.02775100  | 0.01360300  |
| C | -1.38279200 | -0.54455200 | -1.25065900 |
| H | -0.50902300 | -0.23813900 | -1.84973000 |
| H | -1.41696200 | -1.64384100 | -1.23186100 |
| C | -2.61494700 | -0.07145500 | -1.97991500 |
| F | -2.63471900 | 1.25135100  | -2.13488300 |
| F | -3.73654000 | -0.42285700 | -1.35200900 |
| F | -2.64152800 | -0.62291500 | -3.20092100 |

***PCM model in SCRF****Trifluoroacetaldehyde*

|   |             |             |             |
|---|-------------|-------------|-------------|
| C | -0.36072300 | 0.00551900  | -0.00003100 |
| C | 1.06653200  | -0.56677700 | -0.00010900 |
| H | 1.08526800  | -1.67544400 | -0.00028900 |
| F | -1.00949900 | -0.43674200 | 1.07857300  |
| F | -0.37913100 | 1.32242100  | 0.00010300  |
| F | -1.00967700 | -0.43654100 | -1.07854300 |
| O | 2.03308000  | 0.12509300  | -0.00001000 |

${}^1\text{Bu}_3\text{ArOH}$ 

|   |             |             |             |
|---|-------------|-------------|-------------|
| C | -1.50488500 | -0.37342500 | -0.00010000 |
| C | -0.52810800 | -1.35664300 | -0.00011400 |
| C | 0.84027100  | -1.07151500 | -0.00005300 |
| C | 1.21662900  | 0.28088800  | -0.00002100 |
| C | 0.26378500  | 1.31942800  | 0.00000300  |
| C | -1.07507900 | 0.95187000  | -0.00001800 |
| H | -0.83651700 | -2.39387300 | -0.00016300 |
| H | -1.82623200 | 1.73426200  | 0.00003600  |
| O | 2.52754000  | 0.66855100  | 0.00003200  |
| C | 1.87341100  | -2.21030100 | -0.00000600 |
| C | 2.74059800  | -2.16380100 | -1.26820000 |
| C | 2.74064000  | -2.16365100 | 1.26815800  |
| C | 1.20942000  | -3.58797600 | 0.00008700  |
| H | 2.10903800  | -2.26862800 | -2.15700500 |
| H | 3.31759700  | -1.24328100 | -1.40175700 |
| H | 3.45648100  | -2.99389700 | -1.26146600 |
| H | 2.10910700  | -2.26840500 | 2.15699100  |
| H | 3.45653600  | -2.99373500 | 1.26148400  |
| H | 3.31760700  | -1.24309700 | 1.40158100  |
| H | 1.98795000  | -4.35856200 | 0.00015000  |
| H | 0.59002800  | -3.74596300 | 0.88916600  |
| H | 0.59004500  | -3.74609700 | -0.88898100 |
| C | 0.67594500  | 2.79635400  | 0.00005000  |
| C | 1.48830100  | 3.12525800  | 1.25863100  |
| C | 1.48826000  | 3.12533800  | -1.25853600 |
| C | -0.53690900 | 3.72616800  | 0.00009600  |
| H | 0.89708600  | 2.92166600  | 2.15949400  |
| H | 2.41057600  | 2.54604700  | 1.31402100  |
| H | 1.75045300  | 4.19042900  | 1.26358800  |
| H | 0.89700700  | 2.92182700  | -2.15939200 |
| H | 1.75043400  | 4.19050400  | -1.26342000 |
| H | 2.41052100  | 2.54611100  | -1.31400000 |
| H | -0.18765300 | 4.76441900  | 0.00014400  |
| H | -1.16178600 | 3.58979300  | -0.88966700 |
| H | -1.16178400 | 3.58970800  | 0.88984800  |
| C | -3.00016800 | -0.68134700 | -0.00004700 |
| C | -3.64854400 | -0.07896300 | 1.25033900  |
| C | -3.64893500 | -0.07800700 | -1.24976900 |
| C | -3.28730200 | -2.17984700 | -0.00060100 |
| H | -3.20607400 | -0.50289800 | 2.15930600  |
| H | -3.52583900 | 1.00798800  | 1.29426400  |
| H | -4.72418500 | -0.29358100 | 1.26282200  |
| H | -3.20670600 | -0.50118500 | -2.15920500 |
| H | -4.72456000 | -0.29270300 | -1.26209700 |
| H | -3.52636100 | 1.00898900  | -1.29288400 |

|   |             |             |             |
|---|-------------|-------------|-------------|
| H | -4.37056600 | -2.34472100 | -0.00063100 |
| H | -2.87919200 | -2.67418800 | -0.88967000 |
| H | -2.87915200 | -2.67487600 | 0.88806400  |
| H | 3.10184000  | -0.09943800 | -0.00026400 |

<sup>1</sup>Bu<sub>3</sub>CHDO-TFE

|   |             |             |             |
|---|-------------|-------------|-------------|
| C | 0.14423900  | 0.80704400  | 1.40515500  |
| C | 0.58998200  | -1.44068000 | 0.46973100  |
| C | 1.64987900  | -0.94452300 | -0.18095300 |
| C | 1.75794100  | 0.51051900  | -0.35141400 |
| C | 1.01825700  | 1.39116900  | 0.34010400  |
| H | 0.46474500  | -2.51045700 | 0.58336900  |
| H | 2.48222900  | 0.87493400  | -1.07456200 |
| C | -1.33244500 | -1.23429400 | 2.12565400  |
| C | -0.44841600 | -1.59514200 | 3.31854300  |
| C | -2.48867200 | -0.34413200 | 2.58858800  |
| C | -1.95944500 | -2.51374400 | 1.56130800  |
| H | 0.38991700  | -2.23986600 | 3.02990100  |
| H | -0.04622800 | -0.70339000 | 3.80528400  |
| H | -1.04374900 | -2.14352200 | 4.05766200  |
| H | -3.14991000 | -0.09378300 | 1.75364600  |
| H | -3.07935600 | -0.89227200 | 3.33163900  |
| H | -2.13991200 | 0.58041400  | 3.04864900  |
| H | -2.63275300 | -2.94034700 | 2.31281400  |
| H | -2.55991700 | -2.30546000 | 0.66915200  |
| H | -1.22580500 | -3.28879800 | 1.31865200  |
| C | 2.72153900  | -1.80553400 | -0.82786600 |
| C | 2.54183000  | -3.28585900 | -0.51453900 |
| C | 2.64354500  | -1.62602800 | -2.34917800 |
| C | 4.10050200  | -1.37050200 | -0.32361400 |
| H | 2.57442900  | -3.47758700 | 0.56390700  |
| H | 1.59653400  | -3.67659000 | -0.90783200 |
| H | 3.35141400  | -3.85817300 | -0.97970400 |
| H | 2.81316900  | -0.59058800 | -2.66187000 |
| H | 3.40557400  | -2.24422300 | -2.83763400 |
| H | 1.66206100  | -1.93741900 | -2.72697000 |
| H | 4.87925100  | -1.98484600 | -0.78972300 |
| H | 4.32124200  | -0.32447600 | -0.55859000 |
| H | 4.17445500  | -1.49475500 | 0.76263900  |
| C | 1.07810600  | 2.89773000  | 0.16465600  |
| C | 1.80409600  | 3.55345100  | 1.34552700  |
| C | 1.81769600  | 3.27242800  | -1.11617800 |
| C | -0.35196000 | 3.43963300  | 0.06076000  |
| H | 1.28549600  | 3.37381800  | 2.28903200  |
| H | 2.82592000  | 3.16562500  | 1.43263400  |

|   |             |             |             |
|---|-------------|-------------|-------------|
| H | 1.86577400  | 4.63613300  | 1.18117600  |
| H | 1.35613000  | 2.81447400  | -1.99957800 |
| H | 1.78380400  | 4.35926300  | -1.24699800 |
| H | 2.87412200  | 2.98237000  | -1.08497900 |
| H | -0.32614800 | 4.52364000  | -0.09901000 |
| H | -0.88299700 | 2.98557800  | -0.78503700 |
| H | -0.92909700 | 3.24805900  | 0.96910800  |
| C | -0.48624600 | -0.54761500 | 1.02340000  |
| O | -0.05723800 | 1.37613500  | 2.45015100  |
| O | -1.42828500 | -0.09560600 | 0.00398800  |
| C | -1.28035200 | -0.49416200 | -1.31786700 |
| H | -0.41375100 | -0.03209500 | -1.82037700 |
| H | -1.20917400 | -1.58533600 | -1.43820100 |
| C | -2.51796200 | -0.03797100 | -2.04618800 |
| F | -2.66500200 | 1.28733000  | -2.01385100 |
| F | -3.62807200 | -0.57885700 | -1.54075700 |
| F | -2.43981200 | -0.40350300 | -3.33262300 |
